# 1 Identification of Candidate Mitochondrial Inheritance 2 Determinants Using the Mammalian Cell-Free System.

3 Dalen Zuidema<sup>a</sup>, Alexis Jones<sup>a</sup>, Won-Hee Song<sup>a</sup>, Michal Zigo<sup>a</sup>, Peter Sutovsky<sup>a,b,\*</sup>.

4 <sup>a</sup>Division of Animal Sciences, University of Missouri, Columbia, MO 65211-5300; <sup>b</sup>Department of Obstetrics,  
5 Gynecology and Women's Health, University of Missouri, Columbia, MO 65211-5300; \*Correspondence:  
6 SutovskyP@missouri.edu.com; Tel.: +1-(573)-882-3329

**Abstract:** The degradation of sperm-borne mitochondria after fertilization is a conserved event. This process known as post-fertilization sperm mitophagy, ensures exclusively maternal inheritance of the mitochondria-harbored mitochondrial DNA genome. This mitochondrial degradation is in part carried out by the ubiquitin proteasome system. In mammals, ubiquitin-binding pro-autophagic receptors such as SQSTM1 and GABARAP have also been shown to contribute to sperm mitophagy. These systems work in concert to ensure the timely degradation of the sperm-borne mitochondria after fertilization. We hypothesize that other receptors, cofactors, and substrates are involved in post-fertilization mitophagy. Mass spectrometry was used in conjunction with a porcine cell-free system to identify other autophagic cofactors involved in post-fertilization sperm mitophagy. This porcine cell-free system is able to recapitulate early fertilization proteomic interactions. Altogether, 185 proteins were identified as statistically different between control and cell-free treated spermatozoa. Six of these proteins were further investigated, including MVP, PSMG2, PSMA3, FUNDC2, SAMM50, and BAG5. These proteins were phenotyped using porcine *in vitro* fertilization, cell imaging, proteomics, and the porcine cell-free system. The present data confirms the involvement of known mitophagy determinants in the regulation of mitochondrial inheritance and provides a master list of candidate mitophagy co-factors to validate in the future hypothesis-driven studies.

## Introduction

Mitochondria are specialized cellular organelles which serve as the powerhouses of the cell. Mitochondria have been designated as such because of the large amounts of adenosine 5'-triphosphate (ATP) which they generate through both the TCA cycle as well as the electron transport chain. Additionally, mitochondria play roles in various cellular signaling pathways, serve as a calcium ion storage structure, help regulate cellular metabolism (McBride, Neuspiel, & Wasiak, 2006), and can signal for apoptosis (Hajnóczky et al., 2006). Mitochondria are also unique among cellular organelles because they house their own genome distinct from that of the nuclear DNA. This DNA is referred to as mitochondrial or mtDNA. The mtDNA encodes for 13 proteins which are used within the electron transport chain, as well as 22 tRNAs, and 2 rRNAs (Anderson et al., 1981). Mitochondria and the mtDNA which they harbor are almost exclusively inherited from the maternal lineage in most animal species, including humans. This pattern of maternal inheritance results in a single haplotype of the mtDNA being present in offspring.

This pattern of maternal inheritance results in most individual animals inheriting one mitochondrial genome from their mothers. Though naturally occurring maternally derived heteroplasmy (the presence of two distinct populations of mtDNA haplotypes) caused by mutations of the mitochondrial genome is observed (McFarland, Taylor, & Turnbull, 2007), heteroplasmy caused by the inheritance of the father's mtDNA is very rare (Luo et al., 2018; Schwartz & Vissing, 2002). Furthermore, in laboratory settings, researchers have been able to cause heteroplasmy in mice (Sharpley et al., 2012). These heteroplasmic mice were both mentally and physiologically insufficient when compared to their homoplasmic counterparts. The nematode roundworm *Caenorhabditis elegans* has also been utilized in this area of research. These worms were given a specific mtDNA deletion which caused the entire population to become heteroplasmic. It was found that embryonic lethality was 23-fold higher; they had reduced metabolic rates, and the males experienced reduced sperm mobility in this population of worms when compared to homoplasmic counterparts (Liau, Gonzalez-Serricchio, Deshommes, Chin, & LaMunyon, 2007). Thus, in both laboratory animal populations, heteroplasmy was shown to be detrimental. It has also been observed that this mtDNA maternal inheritance pattern has been naturally violated in some human offspring (Luo et al., 2018; Schwartz & Vissing, 2002; Slone et al., 2020). Several multigenerational families have been identified with various forms of paternal mtDNA leakage. In the case of these studies, the heteroplasmy was identified because one of the family members had a mitochondrial

79 disease. Though some of the relatives seemed to carry benign levels of paternal heteroplasmy, other family  
80 members were not so fortunate. Again, showing that when paternal mitochondria are not eliminated, it  
81 appears to eventually result in reduced health and fitness outcomes.

82 The paternal, sperm-borne mitochondria are located on the midpiece of the sperm tail, within a  
83 structure known as the mitochondrial sheath. This sheath organizes mitochondria into a compact helical  
84 configuration and in the livestock mammalian species, this sheath contains 50 to 75 mitochondria (Ankel-  
85 Simons & Cummins, 1996). This mitochondrial sheath structure is quickly degraded from the fertilizing  
86 spermatozoa upon entry into the oocyte cytoplasm in a process known as post-fertilization sperm mitophagy.  
87 This mitophagic process is a nuanced autophagic and proteasome-dependent degradation of the  
88 mitochondria. It has been shown that ubiquitin associates with the sperm mitochondria in primate, ruminant,  
89 and rodent oocyte cytoplasm (P. Sutovsky et al., 1999). It has also been demonstrated that the ubiquitination  
90 of sperm mitochondria takes place in the porcine zygote, where the effect of proteasomal inhibitors on sperm  
91 mitophagy was described for the first time and resulted in implicating the ubiquitin proteasome system as a  
92 pivotal part of this mitophagic process (Sutovsky, McCauley, Sutovsky, & Day, 2003; Sutovsky, Van Leyen,  
93 McCauley, Day, & Sutovsky, 2004). More recently, studies using *Caenorhabditis elegans* and *Drosophila*  
94 revisited the concept of ubiquitin-dependent post-fertilization sperm mitophagy, with a focus on the  
95 autophagic branch of this complex pathway (Al Rawi et al., 2011; Politi et al., 2014; Sato & Sato, 2011; Zhou, Li,  
96 & Xue, 2011). Much of the data from this research has focused on a handful of autophagic proteins. These  
97 proteins included sequestosome 1 (SQSTM1), GABA type A receptor-associated protein (GABARAP),  
98 microtubule-associated protein 1 light chain 3 $\alpha$  (LC3), and valosin-containing protein (VCP). Further research  
99 has shown synergistic efforts between SQSTM1, GABARAP, and VCP in porcine sperm mitophagy (W. H. Song,  
100 Yi, Sutovsky, Meyers, & Sutovsky, 2016). To build upon this research, a better understanding of the potential  
101 co-factors, substrates, other proteins, and other pathways involved in post-fertilization sperm mitophagy is  
102 necessary.

103 The porcine cell-free system used in the present study is designed to recapitulate early fertilization  
104 proteomic interactions which would take place upon the incorporation of the spermatozoa into the ooplasm.  
105 It is a powerful tool that was used in this study (W. H. Song & Sutovsky, 2018), adapted from a similar  
106 amphibian system utilizing the eggs of an African clawed frog, *Xenopus laevis* (Miyamoto et al., 2007;  
107 Miyamoto et al., 2009; Sutovsky, Simerly, Hewitson, & Schatten, 1998). Our porcine system utilizes small  
108 porcine oocytes (100  $\mu$ m diameter) matured *in vitro*, instead of very large, easy to harvest frog eggs (1.2 mm  
109 diameter). Compared to other mammalian models, porcine oocytes are relatively easy to collect and mature  
110 (to fertilization-ready metaphase II stage) in large quantities. Furthermore, the timing of post-fertilization  
111 sperm mitophagy in porcine zygotes is favorable as it occurs prior to the 1<sup>st</sup> embryo cleavage (Sutovsky et al.,  
112 2003); thus, this system can be utilized to study post-fertilization sperm mitophagy in a shorter time span and  
113 without interfering with the established role of the ubiquitin-proteasome system in cell division, a feat that  
114 would be more complicated in a bovine embryo where the post-fertilization sperm mitophagy occurs between  
115 the 2 and 4 cell stage (Peter Sutovsky et al., 1999). Furthermore, *Xenopus* egg extracts do not lend themselves  
116 to the study of mammalian sperm mitophagy as it is a species-specific recognition and degradation process. To  
117 prepare oocyte extracts for this system, MII oocytes are denuded of their cumulus cells and zona pellucida,  
118 then placed in an extraction buffer and subjected to three rounds of flash freezing followed by thawing to  
119 disrupt their cellular membranes. At that point, the oocytes are centrifuged at high speed to be crushed, and  
120 the supernatant present is collected. This oocyte extract contains cytoplasmic proteins and some of the  
121 lysosomal and autophagosomal membrane fractions that participate in mitophagy. The paternal component  
122 of this cell-free system is represented by boar spermatozoa primed through a demembrating treatment

123 with lysophosphatidylcholine (lysolecithin) followed by disulfide bond reduction via dithiothreitol (DTT), a  
124 stepwise treatment which removes the plasma and outer acrosomal membranes of the spermatozoa and  
125 destabilizes the structural sperm proteins in a fashion similar to sperm demembration during sperm-oocyte  
126 fusion and disulfide bond reduction in the sperm head and tail at the time of sperm incorporation in the  
127 oocyte cytoplasm. Thus, this chemical demembration and destabilization is used to replicate *in vivo*  
128 spermatozoa processing during natural fertilization. These primed spermatozoa are then co-incubated with  
129 the oocyte extract for 4 to 24 hours and early fertilization-specific proteomic interactions can be recapitulated.  
130 The porcine cell-free system allows us to observe thousands of spermatozoa interacting with ooplasmic  
131 proteins in a single trial, thus overcoming the limiting factor of one spermatozoon per fertilized egg, as seen in  
132 *in vitro* fertilization (IVF) and intracytoplasmic sperm injection (ICSI) protocols. This cell-free system has been  
133 previously shown to recapitulate fertilization sperm mitophagy events which take place in a zygote (W.-H.  
134 Song et al., 2021; W. H. Song & Sutovsky, 2018).

135 In this study, the porcine cell-free system was used in conjunction with MADLI-TOF mass spectrometry  
136 to conduct a quantitative investigation of early fertilization proteomics (**Fig. 1**). Two different trials were  
137 conducted each containing biological triplicates and based on this data an inventory of 185 proteins ( $p < 0.1$ ) of  
138 potential interest in the context of post-fertilization sperm mitophagy was compiled. Six of these proteins  
139 were further investigated, including major vault protein (MVP), proteasomal assembly chaperone 2 (PSMG2),  
140 proteasomal subunit alpha 3 (PSMA3), FUN14 domain-containing protein 2 (FUND2), sorting and assembly  
141 machinery component 50 (SAMM50), and BAG family molecular chaperone regulator 5 (BAG5). These six  
142 proteins were considered candidate mitophagy proteins of interest based on their known functions in  
143 established autophagy-related pathways. The investigation was an attempt to understand these proteins in  
144 more detail than what was extrapolated from the mass spectrometry data. We once again used the porcine  
145 cell-free system, but this time in conjunction with immunocytochemistry (ICC) and Western blotting (WB), to  
146 characterize the localization and modification changes these proteins underwent within the system.  
147 Furthermore, we investigated these proteins in zygotes after IVF to characterize their localization patterns  
148 during *in vitro* fertilization.

## 149 **Results**

### 151 ***Quantitative Proteomics with the Cell-Free System***

152 MALDI-TOF mass spectrometry was used to analyze spermatozoa which were exposed to the porcine  
153 cell-free system. The goal of this mass spectrometry trial was to capture changes in protein quantities  
154 between control primed spermatozoa samples (no extract exposure) and cell-free system treated sperm  
155 samples. Vehicle control sperm samples were also submitted, as were samples of oocyte extract. A workflow  
156 diagram of the study is shown in **Figure 1**. Three biological replicates of this trial were submitted to compare  
157 primed control vs cell-free treated sperm after 4 hours of cell-free system co-incubation; separately, three  
158 biological replicates were submitted to compare primed control vs cell-free treated spermatozoa after 24  
159 hours of cell-free system co-incubation. During both trials, 3 biological replicates of vehicle control sperm and  
160 oocyte extract were submitted as well. Raw data captured from mass spectrometry was referenced against  
161 the *Sus scrofa* UniProt Knowledge base, thus capturing an inventory of proteins present in each sample and  
162 their relative abundance. The samples were normalized based on the content of outer dense fiber protein 1, 2,  
163 and 3 and then subjected to statistical analysis. The primed control and cell-free treated sperm samples were  
164 statistically compared by using a paired T-test. This T-test compared the relative normalized protein  
165 abundance between the primed control and cell-free treated samples. A P-value of 0.2 (class 1), or 0.1 (class 2  
166 and 3) was considered statistically relevant for the purpose of this study.

167 After T-test analysis in the 4-hour trial, 138 proteins were found to undergo changes ( $p < 0.1$ ) in  
168 abundance between the primed control vs. cell-free treated spermatozoa. In the 24-hour trial, 56 proteins  
169 were ( $p < 0.1$ ) different in abundance between the primed control and cell-free treated spermatozoa. Of these  
170 significant proteins from each trial, 14 overlapped, resulting in a total of 180 statistically different proteins  
171 identified between the two trials. Between the two trials, 24 proteins were only found in cell-free treated  
172 sperm samples and were not present in the primed control samples. These proteins were assumed to be  
173 proteins from the oocyte extract which remained bound to spermatozoa after extract co-incubation. For  
174 proteins that followed this pattern, we loosened our statistical parameters and included proteins in our  
175 inventory out to  $p < 0.2$ . In the 4-hour trial, this resulted in 6 more proteins being included, and in the 24-hour  
176 trial, this resulted in 7 additional proteins. Of these 13 proteins, 8 overlapped; thus, this inclusion step added 5  
177 more proteins to our inventory for a grand total of 185 proteins. The 4-hour inventory ultimately included 144  
178 proteins of interest (**Table 1**), whereas the 24-hour inventory contained 63 proteins of interest (**Table 2**).  
179 These inventories had an overlap of 22 proteins. The full data sheets including all reps for the 4- and 24-hour  
180 trials as well as the normalizations and T-test analyses can be found in **Table S1**.

181 Both the 4-hour and 24-hour protein inventories were divided into three different classes. Class 1  
182 proteins were detected only in the oocyte extract (absent in the vehicle control and primed control  
183 spermatozoa) and found on the spermatozoa only after extract co-incubation. These proteins are interpreted  
184 as ooplasmic mitophagy receptors/determinants and nuclear/centrosomal remodeling factors. Class 2  
185 proteins were detected in the primed control spermatozoa but increased in the spermatozoa exposed to cell-  
186 free system co-incubation. Class 3 proteins were present in both the gametes or only the primed control  
187 spermatozoa, but are decreased in the spermatozoa after co-incubation, interpreted as sperm borne  
188 mitophagy determinants and/or sperm-borne proteolytic substrates of the oocyte autophagic system. These  
189 protein inventories, sorted by class for both the 4- and 24-hour trials, can be found in **Tables 1** and **2**,  
190 respectively.

191 The functions of all the proteins added to these inventories were manually searched and categorized  
192 by using the UniProt Knowledgebase as well as PubMed literature search. Based on known functions, all  
193 proteins were categorized, and pie charts were rendered (**Figure 2A-F**). It should be noted that our Mass  
194 Spectrometry generated data was analyzed for proteins by using the UniProt Knowledgebase and was only  
195 analyzed for known *Sus scrofa* proteins.  
196

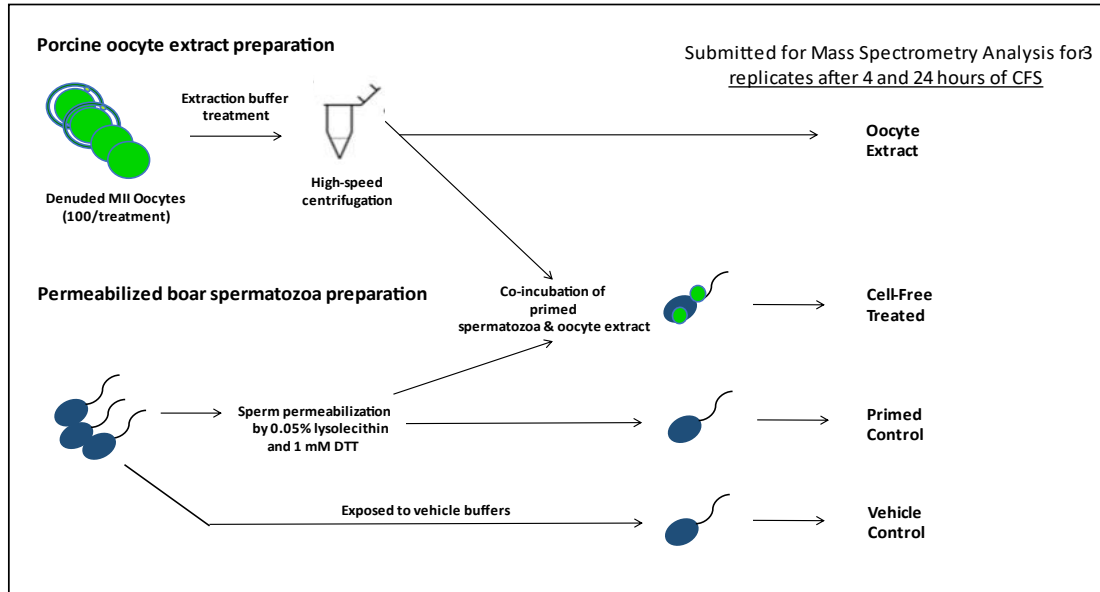

197  
198

**Figure 1.** The porcine cell-free system and workflow diagram for the preparation of samples for mass spectrometry analysis.



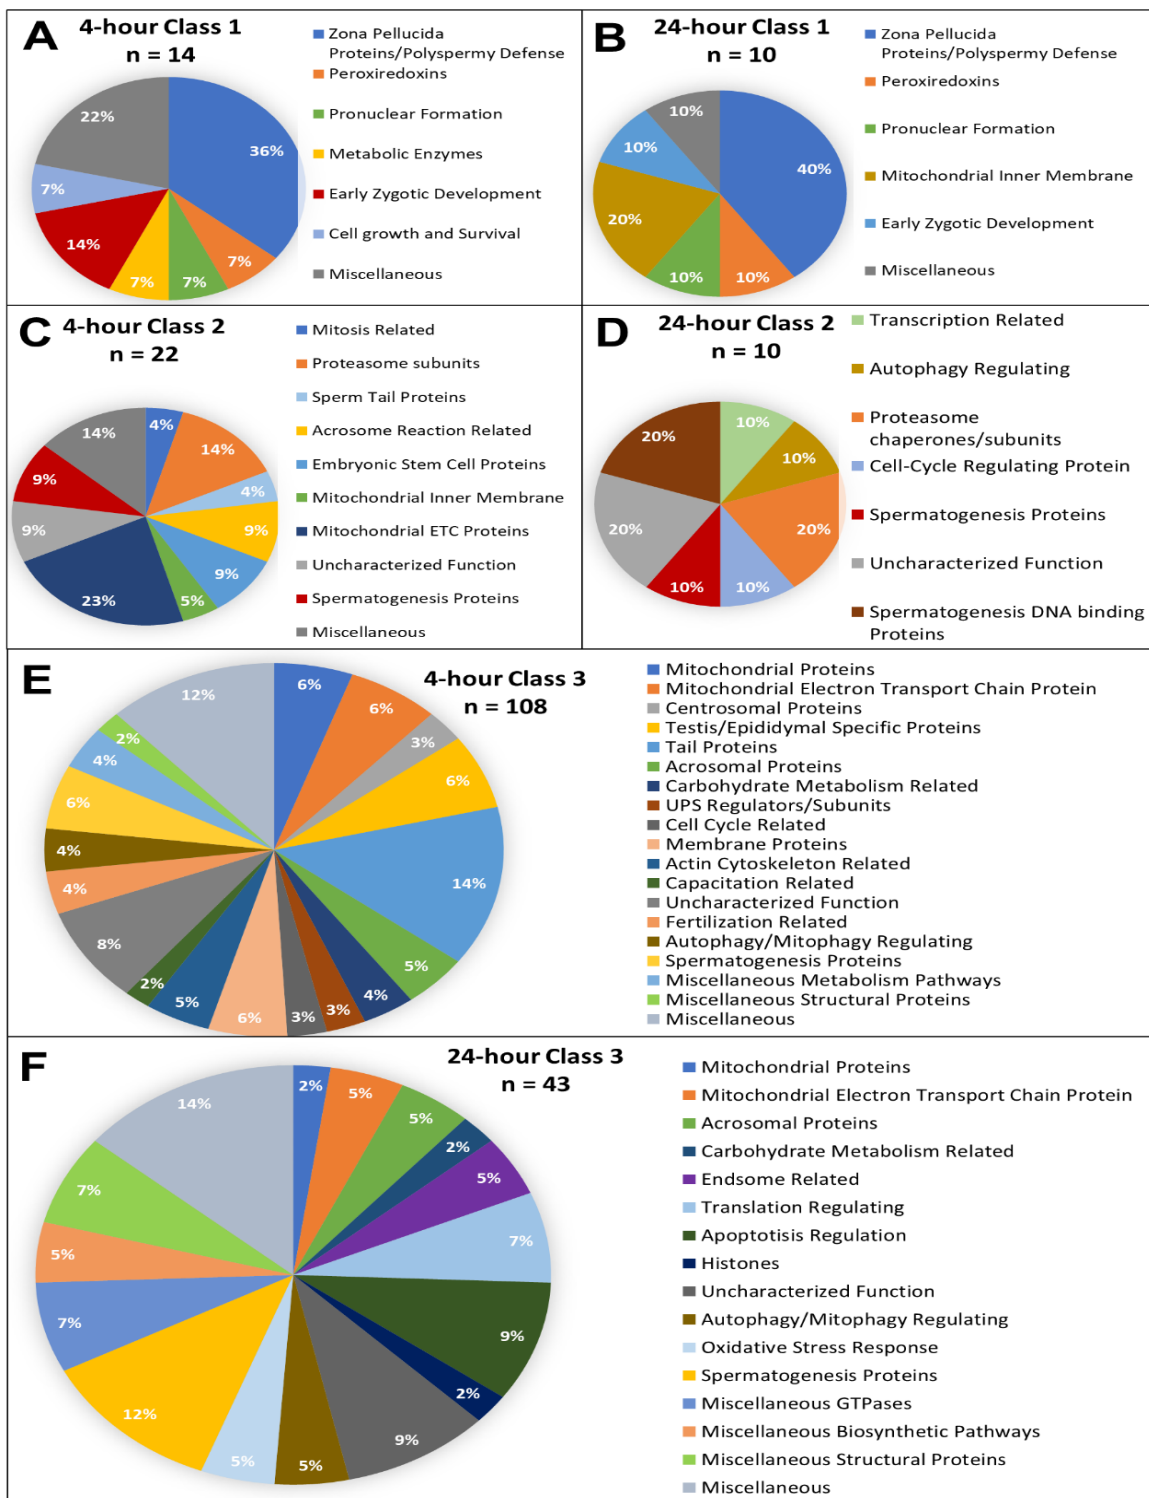

**Figure 2.** Candidate protein categorization by their functions. Proteins found in different amounts after cell-free system co-incubation at both 4 and 24 hours are categorized by function as found on Uniprot.org and literature via Pubmed.com. Protein characterizations of Class 1 found only in cell-free treated spermatozoa samples after 4 hours of cell-free system co-incubation (A), and 24 hours of cell-free system co-incubation (B) vs primed control spermatozoa ( $p < 0.2$ ). Characterization of Class 2 proteins which underwent an increase in abundance ( $p < 0.1$ ) in cell-free treated spermatozoa during the 4-hour (C) and 24-hour (D) cell-free system trials vs primed control spermatozoa. Class 3 proteins, which underwent a decrease in abundance ( $p < 0.1$ ) in cell-free treated spermatozoa after 4 hours (E) and 24 hours (F) of cell-free system co-incubation vs primed control spermatozoa.

207  
208  
209

**TABLE 1:** Proteomic identification of mitophagy and sperm remodeling cofactors in the porcine cell-free system after 4 hours of co-incubation.

| Protein of Interest<br>Legend:<br>GN = Gene name<br>PE = protein existence level<br>SV = Sequence version<br>(PE and SV only included for proteins which had multiple versions in the table) | Proposed role in autophagy/mitophagy/post-fertilization sperm structure remodeling by zygote, and original references describing identified proteins' role in those events.                                                                                                                | P value based on 3 rep T-test analysis |
|----------------------------------------------------------------------------------------------------------------------------------------------------------------------------------------------|--------------------------------------------------------------------------------------------------------------------------------------------------------------------------------------------------------------------------------------------------------------------------------------------|----------------------------------------|
| <b>CLASS 1 – Proteins detectable on spermatozoa only after extract exposure.</b>                                                                                                             |                                                                                                                                                                                                                                                                                            |                                        |
| Metalloendopeptidase a.k.a. Ovastacin GN: ASTL                                                                                                                                               | Member of peptidase family involved in reproductive protein processing in <i>Drosophila</i> ; (ov)astacin is secreted by mouse oocyte to cleave zona, prevent polyspermy. Ram <i>et al.</i> , 2006 DOI: 10.1073/pnas.0606228103 ; Burkart <i>et al.</i> , 2012; DOI: 10.1083/jcb.201112094 | 0.00003                                |
| Zona pellucida sperm-binding protein 3 GN: ZP3 (PE: 1, SV: 1)                                                                                                                                | Involved in sperm-egg recognition, acrosomal reaction, and polyspermy defense. Zimmerman <i>et al.</i> , 2011 DOI: 10.1371/journal.pone.0017256                                                                                                                                            | 0.00003                                |
| Major vault protein GN: MVP                                                                                                                                                                  | Regulates cell growth and survival through the STAT3 and Akt signaling pathways. Das <i>et al.</i> , 2016 DOI: 10.1016/j.cellsig.2015.10.007                                                                                                                                               | 0.00006                                |
| Peptidyl arginine deiminase 6 GN: PADI6                                                                                                                                                      | Essential for early zygotal development, specifically cytoskeletal sheet formation through citrullination. Essential for female fertility. Esposito <i>et al.</i> , 2007 DOI: 10.1016/j.mce.2007.05.005                                                                                    | 0.00007                                |
| Malic enzyme GN: ME2                                                                                                                                                                         | Participates in pyruvate metabolic process, located in the mitochondria. <a href="http://www.uniprot.org">www.uniprot.org</a>                                                                                                                                                              | 0.00008                                |
| Aprotinin Accession: B0LXF7                                                                                                                                                                  | A serine protease inhibitor which decreases bleeding. Robert <i>et al.</i> , 1996 DOI: 10.1177/106002809603000410                                                                                                                                                                          | 0.0001                                 |
| Zona pellucida sperm-binding protein 4 GN: ZP4                                                                                                                                               | Involved in sperm-egg recognition, acrosomal reaction, and polyspermy defense. Zimmerman <i>et al.</i> , 2011 DOI: 10.1371/journal.pone.0017256                                                                                                                                            | 0.0002                                 |
| Uncharacterized protein GN: PRDX3                                                                                                                                                            | Necessary for normal mitochondrial function. Localizes to the mitochondria after peroxide exposure and acts as a peroxide reducing agent. Wonsey <i>et al.</i> , 2002 DOI: 10.1073/pnas.102523299                                                                                          | 0.0006                                 |
| Zona pellucida sperm-binding protein 3 GN: ZP3 (PE: 4, SV: 1)                                                                                                                                | Involved in sperm-egg recognition, acrosomal reaction, and polyspermy defense. Zimmerman <i>et al.</i> , 2011 DOI: 10.1371/journal.pone.0017256                                                                                                                                            | 0.1835                                 |
| DNA (cytosine-5)-methyltransferase GN: DNMT1                                                                                                                                                 | Helps maintain DNA methylation problems through cell divisions. It is found within the cytoplasm of MII oocytes and early-stage embryos, later localizing to the nuclei of 8 – 16 cell embryos. Lodde <i>et al.</i> , 2009 DOI: 10.4081/ejh.2009.e24                                       | 0.1835                                 |
| Nucleophosmin/nucleoplasmin 2 GN: NPM2                                                                                                                                                       | Sperm nucleus remodeling after fertilization. Required for histone import into paternal pronucleus. McLay & Clark., 2003 DOI: 10.1530/rep.0.1250625                                                                                                                                        | 0.1836                                 |
| Zona pellucida sperm-binding protein 2 GN: ZP2 (SV:2)                                                                                                                                        | Involved in sperm-egg recognition, acrosomal reaction, and polyspermy defense. Zimmerman <i>et al.</i> , 2011 DOI: 10.1371/journal.pone.0017256                                                                                                                                            | 0.1837                                 |
| 1-aminocyclopropane-1-carboxylate synthase homolog (inactive) like GN: ACCSL                                                                                                                 | Binds pyridoxal phosphates and has catalytic activity. <a href="http://www.uniprot.org">www.uniprot.org</a>                                                                                                                                                                                | 0.1842                                 |
| Extended synaptotagmin 1 GN: ESYT1                                                                                                                                                           | Located in the ER and acts as a lipid transport protein. Interacts with PI(4,5)P, and calcium to transfer lipids through membranes. Xie <i>et al.</i> , 2018 DOI: 10.1096/fj.201801878R                                                                                                    | 0.1859                                 |
| <b>CLASS 2 - Detected in the vehicle and primed control spermatozoa, increased in extract-exposed spermatozoa.</b>                                                                           |                                                                                                                                                                                                                                                                                            |                                        |



|                                                        |                                                                                                                                                                                                                                                     |        |
|--------------------------------------------------------|-----------------------------------------------------------------------------------------------------------------------------------------------------------------------------------------------------------------------------------------------------|--------|
| Peroxioredoxin 2 GN: PRDX2 (SV: 1)                     | Antioxidant enzyme that plays role in ROS protection immediately after fertilization. Morita <i>et al.</i> , 2018 DOI: 10.1262/jrd.2018-005                                                                                                         | 0.0004 |
| Cytochrome c1 GN: CYC1                                 | Part of the mitochondrial electron transport chain. Forms a complex with cytochrome c and cytochrome oxidase. Located on the inner mitochondrial membrane. Chiang & King 1979 PMID:33986                                                            | 0.0125 |
| Cytochrome c oxidase subunit 5A GN: COX5A              | Cytochrome c oxidase is a protein complex made up of 13 subunits encoded by mtDNA and nuclear DNA. Without COX5A, cytochrome c oxidase fails to form. Fornuskova <i>et al.</i> , 2010 DOI: 10.1042/BJ20091714                                       | 0.0143 |
| Proteasome subunit alpha type: PSMA3 & PSMA2           | Pharmacological inhibition of 20S core activity prevents sperm mitophagy in porcine zygote. Sutovsky <i>et al.</i> , 2003 DOI: 10.1095/biolreprod.102.012799                                                                                        | 0.0152 |
| Stomatin like 2 GN: STOML2                             | Mitochondrial protein which forms microdomains within the inner membrane. It is a regulator of mitochondrial translation. Mitsopoulos <i>et al.</i> , 2017 DOI: 10.1371/journal.pone.0179967                                                        | 0.0174 |
| Outer dense fiber of sperm tails 2 GN: ODF2            | Sperm flagellum and centrosomal protein. Play a critical role in embryo preimplantation, this role remains unknown. Salmon <i>et al.</i> , 2006 DOI: 10.1002/dvg.20241                                                                              | 0.0199 |
| Uncharacterized protein GN: NDUFB5                     | Part of the mitochondrial respiratory chain complex I assembly. Integral component of the mitochondrial inner membrane. www.uniprot.org                                                                                                             | 0.0219 |
| A-kinase anchoring protein 4 GN: AKAP4                 | Flagellated sperm motility, transmembrane receptor protein serine/threonine kinase signaling pathway, located in the sperm principal piece. Assists in capacitation and acrosome reaction. Ben-Navi <i>et al.</i> , 2016 DOI: 10.1038/srep37922     | 0.0424 |
| RIB43A domain with coiled-coils 1 GN: RIBC1            | A protein which is overexpressed in high fertility bull sperm. However, its function is not known. Muhammad Aslam <i>et al.</i> , 2018 DOI: 10.1016/j.theriogenology.2018.06.021                                                                    | 0.0438 |
| NADH:ubiquinone oxidoreductase subunit B9 GN: NDUFB9   | Part of the mitochondrial respiratory chain complexes, specifically Complex I. Mutations of this subunit cause CI deficiency. One of the subunits responsible for CI and CIII interactions. Wu <i>et al.</i> , 2016 DOI: 10.1016/j.cell.2016.11.012 | 0.0465 |
| Uncharacterized protein Accession: A0A287A4B9          | BPTI/Kunitz inhibitor domain-containing protein. Serine-type endopeptidase inhibitor activity. Gene name: PTI. www.uniprot.org                                                                                                                      | 0.049  |
| Testis-specific serine kinase 6 GN: TSSK6              | Involved in sperm chromatin condensation, and crucial for spermiogenesis. Heat shock protein 90 regulates TSSK6 and shields it from ubiquitin-mediated catabolism. Jha <i>et al.</i> , 2013 DOI: 10.1074/jbc.M112.400978                            | 0.0497 |
| Uncharacterized protein GN: OAZ3                       | OAZ3 is expressed specifically during spermiogenesis. Essential for rigid junction between the head and tail of spermatozoa. Tokuhira <i>et al.</i> , 2009 DOI: 10.1371/journal.pgen.1000712                                                        | 0.0615 |
| NADH:ubiquinone oxidoreductase subunit B10 GN: NDUFB10 | Part of the mitochondrial respiratory chain complexes, specifically Complex I. One of the subunits which forms intramolecular disulfides within CI. Wu <i>et al.</i> , 2016 DOI: 10.1016/j.cell.2016.11.012                                         | 0.0694 |
| Chromosome 9 open reading frame 135 GN: C9orf135       | Down regulated during gametogenesis. Believed to encode a membrane protein which serves as a surface marker for undifferentiated embryonic stem cells. Zhou <i>et al.</i> , 2017 DOI: 10.1038/srep45311                                             | 0.0705 |

|                                                                                                   |                                                                                                                                                                                                                                                                                          |        |
|---------------------------------------------------------------------------------------------------|------------------------------------------------------------------------------------------------------------------------------------------------------------------------------------------------------------------------------------------------------------------------------------------|--------|
| Tektin 2 GN: TEKT2                                                                                | Associates with and organizes the central spindle during mitosis. Durcan <i>et al.</i> , 2008 DOI: 10.1083/jcb.200711160                                                                                                                                                                 | 0.0736 |
| Uncharacterized protein GN: BANF1                                                                 | Contributes to embryonic stem cell self-renewal properties, preventing them from differentiating too quickly. Cox <i>et al.</i> , 2011 DOI: 10.1242/jcs.083238                                                                                                                           | 0.0771 |
| Chromosome 4 open reading frame 45 GN: C4orf45                                                    | Uncharacterized function. <a href="http://www.uniprot.org">www.uniprot.org</a>                                                                                                                                                                                                           | 0.0914 |
| Proteasome subunit alpha type GN: PSMA8                                                           | A testis specific proteasomal subunit found during spermatogenesis. Appears crucial for proper meiotic exit by the forming spermatids. Gomez-H <i>et al.</i> , 2019 DOI: 10.1371/journal.pgen.1008316                                                                                    | 0.092  |
| Tektin 1 GN: TEKT1                                                                                | Found in both the acrosome and flagella of spermatozoa. May participate in sperm head cytoskeletal roles or serve a function in the acrosome reaction. Oiki <i>et al.</i> , 2014 DOI: 10.2108/zsj.31.101                                                                                 | 0.0922 |
| Ferritin GN: FTH1                                                                                 | Acts as an inhibitor of death domain-associated protein (Daxx), which serves as an inhibition of the Daxx apoptosis pathway. Liu <i>et al.</i> , 2012 DOI: 10.1007/s11033-011-0811-5                                                                                                     | 0.0949 |
| <b>CLASS 3 - Detected in spermatozoa before extract exposure, reduced after extract exposure.</b> |                                                                                                                                                                                                                                                                                          |        |
| Oxoglutarate dehydrogenase like GN: OGDHL                                                         | A rate limiting component of the OGDH complex, a mitochondrial protein complex. OGDHL regulates cell growth, apoptosis and seems to play a role in cancer development when overexpressed. Sen <i>et al.</i> , 2012 DOI: 10.1371/journal.pone.0048770                                     | 0.0008 |
| Kinesin-like protein GN: KIF5B                                                                    | Involved in centrosome localization, cytoplasmic organization and assists with regulating protein localization to the plasma membrane. <a href="http://www.uniprot.org">www.uniprot.org</a>                                                                                              | 0.0008 |
| Dpy-19 like 2 GN: DPY19L2                                                                         | Proposed to serve as an anchor between the acrosome and the nucleus of the sperm. It is required for proper acrosome spreading and head formation during spermatogenesis. Pereira <i>et al.</i> , 2019 DOI: 10.1111/brv.12498                                                            | 0.0021 |
| Coiled-coil domain containing 188 GN: CCDC188                                                     | Identified as a novel candidate gene for retinitis pigmentosa. However, function remains unknown. Yi <i>et al.</i> , 2020 DOI: 10.1016/j.ebiom.2020.102792                                                                                                                               | 0.0033 |
| Uncharacterized protein GN: LOC110255463                                                          | Glyco_hydro_35 domain-containing protein. Beta-galactosidase activity within the carbohydrate metabolic pathway. <a href="http://www.uniprot.org">www.uniprot.org</a>                                                                                                                    | 0.0034 |
| Leucine zipper transcription factor like 1 GN: LZTFL1                                             | Interacts with Bardet-Biedl Syndrome protein complex and regulates this complex's ciliary traffic and signaling. Seo <i>et al.</i> , 2011 DOI: 10.1371/journal.pgen.1002358                                                                                                              | 0.0034 |
| Peptidyl-prolyl cis-trans isomerase GN: PPIL1                                                     | Participates in mRNA splicing, protein folding and peptidyl-prolyl isomerization. <a href="http://www.uniprot.org">www.uniprot.org</a>                                                                                                                                                   | 0.0037 |
| NmrA like redox sensor 1 GN: NMRAL1                                                               | Transcriptional regulator which responds to cell metabolism by causing changes in gene expression. Garciandia & Suarez 2013 DOI: 10.1016/j.ydbio.2013.06.013                                                                                                                             | 0.0042 |
| Glycogen synthase kinase 3 beta variant 5 GN: GSK3B                                               | Mediates the phosphorylation of MCL1. Once phosphorylated, MCL1 undergoes ubiquitination and proteasomal degradation which releases BECLIN1 to induces axonal autophagy. Wakatsuki <i>et al.</i> , 2017 DOI: 10.1083/jcb.201606020                                                       | 0.0048 |
| mRNA export factor GN: RAE1                                                                       | Active during interphase as a mitotic checkpoint and spindle assembly regulator. When inhibited, defects in spindle organization, chromosome alignment and segregation, and delayed cell cycle progression were observed. Lee <i>et al.</i> , 2009 DOI: 10.1111/j.1365-313X.2009.03869.x | 0.0048 |

|                                                                                 |                                                                                                                                                                                                                                                                                                                |        |
|---------------------------------------------------------------------------------|----------------------------------------------------------------------------------------------------------------------------------------------------------------------------------------------------------------------------------------------------------------------------------------------------------------|--------|
| Cullin 4B GN: CUL4B                                                             | E3 ubiquitin ligase believed to initiate polyubiquitination of $\gamma$ -tubulin and thereby control centrosomal stability through ubiquitination of $\gamma$ -tubulin. Thirunavukarasou <i>et al</i> , 2015 DOI: 10.1007/s11010-014-2309-7                                                                    | 0.0049 |
| Uncharacterized protein<br>Accession: F1RHJ8                                    | No described function www.uniprot.org                                                                                                                                                                                                                                                                          | 0.0053 |
| Dihydroxyacetone phosphate<br>acyltransferase GN: GNPAT                         | Part of the plasmalogen biosynthetic pathway. Plasmalogens make up the spermatozoa membrane and play a role in their maturation. Reisse <i>et al.</i> , 2001 DOI: 10.1095/biolreprod64.6.1689                                                                                                                  | 0.0058 |
| 26S proteasome non-ATPase<br>regulatory subunit 2 GN: PSMD2                     | Necessary for cell proliferation and cell cycle progression. Interacts with p21 and p27 and mediates their ubiquitin-proteasomal degradation. Li <i>et al.</i> , 2018 DOI: 10.1016/j.canlet.2018.05.018                                                                                                        | 0.0083 |
| Glutamine rich 2 GN: QRICH2                                                     | Necessary for proper sperm flagellum formation. Shen <i>et al.</i> , 2019 DOI: 10.1038/s41467-018-08182-x                                                                                                                                                                                                      | 0.0084 |
| Sperm acrosome membrane-<br>associated protein 1 GN: SPACA1                     | Involved in acrosome assembly, localized to the equatorial segment. Functions in sperm-egg fusion. Fujihara <i>et al.</i> , 2012 DOI: 10.1242/dev.081778                                                                                                                                                       | 0.0087 |
| cAMP-dependent protein kinase<br>type I-alpha regulatory subunit<br>GN: PRKAR1A | Interacts with A-kinase anchoring proteins and responds to intracellular cAMP concentrations. Barradeau <i>et al.</i> , 2002 DOI: 10.1016/s1050-1738(02)00167-6                                                                                                                                                | 0.0106 |
| NADH dehydrogenase<br>(ubiquinone) flavoprotein 1<br>mitochondrial GN: NDUFV1   | Mitochondrial protein that is part of the electron transport chain. Part of complex I. Varghese <i>et al.</i> , 2015 DOI: 10.1093/hmg/ddv344                                                                                                                                                                   | 0.0107 |
| Spermatogenesis associated 3<br>GN: SPATA3                                      | Testis specific protein. Current function is unknown but believed important for spermatogenesis. Zhou <i>et al.</i> , 2020 DOI: 10.1007/s11033-019-04825-4                                                                                                                                                     | 0.012  |
| Actin like 7B GN: ACTL7B                                                        | A spermatogenesis-specific actin like protein. Tanaka <i>et al.</i> , 2019 DOI: 10.22074/ijfs.2019.5702                                                                                                                                                                                                        | 0.0121 |
| Cytochrome c oxidase subunit<br>7A2 like GN: COX7A2L                            | Mitochondrial respiratory chain protein. Acts as a regulatory checkpoint for Complex III, however, is nonessential for mitochondrial respiration. Lobo-Jarne <i>et al.</i> , 2018 DOI: 10.1016/j.celrep.2018.10.058                                                                                            | 0.0123 |
| Triosephosphate isomerase GN:<br>TPI1                                           | Enzyme utilized during glycolysis. Catalyzes the conversion of DHAP to G3P. However, there is evidence suggesting that this is the same protein as P36, a sperm protein present along the acrosomal membrane and believed essential for normal fertilization. Auer <i>et al.</i> , 2004 DOI: 10.1002/mrd.20107 | 0.0126 |
| Cilia and flagella associated<br>protein 52 GN: CFAP52                          | Involved in the motility of flagella. www.uniprot.org                                                                                                                                                                                                                                                          | 0.014  |
| SUMO peptidase family member<br>NEDD8 specific GN: SENP8                        | Contributes to proper cell cycle progression, and maintenance of neddylation levels. Coleman <i>et al.</i> , 2017 DOI: 10.7554/eLife.24325                                                                                                                                                                     | 0.0141 |
| Fibrous sheath interacting<br>protein 2 GN: FSIP2                               | Tail protein responsible for proper flagellum morphology. Martinez <i>et al.</i> , 2018 DOI: 10.1093/humrep/dey264                                                                                                                                                                                             | 0.0144 |
| Testis specific serine kinase 4 GN:<br>TSSK4                                    | Induces apoptosis in spermatogonia and spermatocytes. Seemingly functions as a quality assurance regulator of spermatogenesis. Wang <i>et al.</i> , 2015 DOI: 10.1007/s11596-015-1417-2                                                                                                                        | 0.0146 |
| Uncharacterized protein GN:<br>LOC100626097                                     | No described functions www.uniprot.org                                                                                                                                                                                                                                                                         | 0.0163 |
| Serpin family B member 6 GN:<br>SERPINB6                                        | Serine protease inhibitor which is expressed in male germ cells and female somatic cells. Believed to play some role in gonad development, gametogenesis, and/or fertilization. Charron <i>et al</i> , 2006 DOI: 10.1002/mrd.20385                                                                             | 0.0164 |

|                                                                          |                                                                                                                                                                                                                           |        |
|--------------------------------------------------------------------------|---------------------------------------------------------------------------------------------------------------------------------------------------------------------------------------------------------------------------|--------|
| Lon protease homolog mitochondrial GN: LONP1                             | A mitochondrial protease which participates in maturation of a subset of proteins which is necessary for mitochondrial proteostasis and normal gene expression. Rendon & Shoubridge 2018 DOI: 10.1128/MCB.00412-17        | 0.017  |
| Vacuolar protein sorting 13 homolog A GN: VPS13A                         | Required for lipid transfer to various organelles, including the mitochondria, where it influences morphology. Yeshaw <i>et al.</i> , 2019 DOI: 10.7554/eLife.43561                                                       | 0.018  |
| Protein kinase cAMP-dependent type I regulatory subunit beta GN: PRKAR1B | Inhibits cAMP-dependent protein kinase pathways and binds the catalytic subunit of PKA <a href="http://www.uniprot.org">www.uniprot.org</a>                                                                               | 0.0189 |
| Nardilysin convertase GN: NRD1_tv2                                       | Metalloendopeptidase activity. Involved in protein catabolism and regulation of membrane ectodomain proteolysis. <a href="http://www.uniprot.org">www.uniprot.org</a>                                                     | 0.0195 |
| Creatine kinase B-type GN: CKB                                           | Part of the phosphocreatine biosynthetic pathway. Binds ATP and produces N-phosphocreatine. <a href="http://www.uniprot.org">www.uniprot.org</a>                                                                          | 0.0195 |
| Uncharacterized protein GN: LOC102158372                                 | Integral membrane component. <a href="http://www.uniprot.org">www.uniprot.org</a>                                                                                                                                         | 0.0203 |
| Protein phosphatase 1 regulatory subunit 9B GN: PPP1R9B                  | Involved in cell migration, calcium-mediated signaling and actin filament organization. <a href="http://www.uniprot.org">www.uniprot.org</a>                                                                              | 0.0205 |
| Glutamine synthetase GN: GLUL                                            | Enzyme which catalyzes the condensation of glutamate and ammonia to form glutamine. Cellular localization is regulated by GABA type B receptors. Huyghe <i>et al.</i> , 2014 DOI: 10.1074/jbc.M114.583534                 | 0.0208 |
| BAG family molecular chaperone regulator 5 isoform b GN: BAG5_tv3        | Negatively regulates mitophagy through the suppression of Parkin recruitment. Snoo <i>et al.</i> , 2019 DOI: 10.1038/s41419-019-2132-x                                                                                    | 0.0212 |
| Lysozyme like 4 GN: LYZL4                                                | Found in high levels in the acrosome and principal piece on spermatozoa. Shown to be important for fertilization. Sun <i>et al.</i> , 2011 DOI: 10.1093/abbs/gmr017                                                       | 0.0226 |
| Actin related protein T3 GN: ACTRT3                                      | Found within male germ cell nuclei, part of the actin cytoskeleton. <a href="http://www.uniprot.org">www.uniprot.org</a>                                                                                                  | 0.0228 |
| Phosphoglycerate kinase GN: PGK2                                         | This enzyme is specific to sperm glycolysis and replaces the PGK1 enzyme found in all other cell types. Essential for sperm motility and ATP generation. Danshina <i>et al.</i> , 2010 DOI: 10.1095/biolreprod.109.079699 | 0.0233 |
| Protein interacting with cyclin A1 GN: PROCA1                            | Part of the phospholipid metabolic pathway. <a href="http://www.uniprot.org">www.uniprot.org</a>                                                                                                                          | 0.0263 |
| Dynein axonemal heavy chain 3 GN: DNAH3                                  | Known to affect sperm motility & play a role in male fertility. Rezende <i>et al.</i> , 2018 DOI: 10.1111/age.12710                                                                                                       | 0.0265 |
| Epididymis-specific alpha-mannosidase GN: MAN2B2                         | Lysosomal type D-mannosidase found exclusively in epididymal fluid and sperm cells. Zhao <i>et al.</i> , 2019 DOI: 10.1016/j.theriogenology.2019.08.006                                                                   | 0.0284 |
| Aldehyde dehydrogenase 1 family member A1 GN: ALDH1A1                    | Part of the retinoic acid signaling pathway in the testes. Plays a role in spermatogenesis and responds to gonadotropin stimulation. Nourashrafeddin & Rashidi 2018 PMID: 29436793                                        | 0.029  |
| Translocase of outer mitochondrial membrane 34 GN: TOMM34                | A chaperone-like protein which imports preproteins into the mitochondria. Blesa <i>et al.</i> , 2008 DOI: 10.1139/o07-151                                                                                                 | 0.0306 |
| Kinetochores localized astrin (SPAG5) binding protein GN: KNSTRN         | Involved in chromosome segregation, regulation of attachment of spindle microtubules to kinetochores, & spindle organization. <a href="http://www.uniprot.org">www.uniprot.org</a>                                        | 0.033  |

|                                                                             |                                                                                                                                                                                                                          |        |
|-----------------------------------------------------------------------------|--------------------------------------------------------------------------------------------------------------------------------------------------------------------------------------------------------------------------|--------|
| Testin GN: TES                                                              | A protein which is secreted by Sertoli cells and regulates the blood-testis barrier. Also found in ovaries. Su <i>et al.</i> , 2020 DOI: 10.1002/jcp.29541                                                               | 0.0332 |
| Family with sequence similarity 170 member A GN: FAM170A                    | No described function. www.uniprot.org                                                                                                                                                                                   | 0.0804 |
| SAMM50 sorting and assembly machinery component GN: SAMM50                  | Regulator of PINK1-Parkin mediated mitophagy. A Samm50 depletion results in PINK1 build up, Parkin recruitment and subsequent mitophagy. Jian <i>et al.</i> , 2018 DOI: 10.1016/j.celrep.2018.05.015                     | 0.0345 |
| Fascin GN: FSCN3                                                            | Essential for spermatid development, establishment and maintenance of cell polarity, actin filament binding. Expressed in the spermatid head. Tubb <i>et al.</i> , 2002 DOI: 10.1006/excr.2002.5486                      | 0.0347 |
| Tyrosine 3-monooxygenase/tryptophan 5-monooxygenase activation protein zeta | Newly described regulator of capacitation-associated tyrosine phosphorylation. Saez <i>et al.</i> , 2019 DOI: 10.1111/andr.12634                                                                                         | 0.0379 |
| NSF attachment protein alpha GN: NAPA                                       | Soluble N-ethylmaleimide-sensitive factor attaching activities. www.uniprot.org                                                                                                                                          | 0.0384 |
| WD repeat domain 63 GN: WDR63                                               | Upregulated by p53, negatively regulates cell migration, invasion, and metastasis. Zhao <i>et al.</i> , 2020 DOI: 10.15252/embr.201949269                                                                                | 0.0422 |
| Uncharacterized protein GN: LOC100154312                                    | Involved with the centrosomes, but no described function. www.uniprot.org                                                                                                                                                | 0.0429 |
| Zona pellucida-binding protein 1 GN: ZBPB                                   | Important for acrosome assembly, as well as binding of sperm to the zona pellucida. Yatsenko <i>et al.</i> , 2012 DOI: 10.1093/molehr/gar057                                                                             | 0.043  |
| Mitochondrial associated cysteine-rich protein GN: SMCP                     | Localized to the mitochondrial capsule and contributes to flagellum movement. Hawthorne <i>et al.</i> , 2006 DOI: 10.1016/j.ygeno.2005.09.010                                                                            | 0.0436 |
| Uncharacterized protein GN: SCO2                                            | Induces p53-mediated apoptosis. It is a cytochrome c oxidase assembly factor and increases reactive oxygen species production. Madan <i>et al.</i> , 2013 DOI: 10.1128/MCB.06798-11                                      | 0.0438 |
| Epididymal sperm-binding protein 1 GN: ELSPBP1                              | In bovine, this protein binds dead sperm within the epididymis. D'Amours <i>et al.</i> 2012 DOI: 10.1095/biolreprod.112.100990;                                                                                          | 0.0445 |
| Armadillo repeat containing 4 GN: ARMC4                                     | Participates in cilium movement and outer dynein arm assembly. www.uniprot.org                                                                                                                                           | 0.0448 |
| Chromosome 1 open reading frame 56 GN: C1orf56                              | Regulates cell population proliferation. www.uniprot.org                                                                                                                                                                 | 0.0457 |
| Regulator of G protein signaling 22 GN: RGS22                               | Regulates G-protein signaling during spermiogenesis. Hu <i>et al.</i> , 2008 DOI: 10.1095/biolreprod.107.067504                                                                                                          | 0.0457 |
| Hypoxanthine-guanine phosphoribosyltransferase GN: HPRT1                    | Plays a role in purine regulation and generation through the salvage of IMP and GMP. Appears to be found in high amounts within many types of cancer cells Townsend <i>et al.</i> , 2018. DOI: 10.1007/s12032-018-1144-1 | 0.0468 |
| Kinesin-like protein GN: KIF9                                               | Testis specific kinesin. Regulates flagellar motility and acts as a molecular motor in spermatozoa tails. Miyata <i>et al.</i> , 2020 DOI: 10.1096/fj.201902755R                                                         | 0.0468 |
| Immunity-related GTPase family cinema protein GN: IRGC                      | GTPase activity, located in the cell membrane. www.uniprot.org                                                                                                                                                           | 0.0476 |

|                                                                                      |                                                                                                                                                                                                                                                  |        |
|--------------------------------------------------------------------------------------|--------------------------------------------------------------------------------------------------------------------------------------------------------------------------------------------------------------------------------------------------|--------|
| Dynein axonemal heavy chain 17<br>GN: DNAH17                                         | Sperm-specific axonemal outer dynein arm protein. Necessary for male fertility and normal flagellum movement and morphology. Whitfield <i>et al.</i> , 2019 DOI: 10.1016/j.ajhg.2019.04.015                                                      | 0.0478 |
| Vaccinia related kinase 3 GN:<br>VRK3                                                | Part of the Wnt signaling pathway, negatively regulates ERK1 & 2, and positively regulates phosphoprotein phosphatase activity. www.uniprot.org                                                                                                  | 0.0488 |
| Dynein axonemal heavy chain 8<br>GN: DNAH8                                           | Sperm-specific axonemal outer dynein arm protein. Necessary for male fertility and normal flagellum movement and morphology. Whitfield <i>et al.</i> , 2019 DOI: 10.1016/j.ajhg.2019.04.015                                                      | 0.0498 |
| Retinoic acid receptor responder<br>1 GN: RARRES1                                    | Metalloendopeptidase inhibitor activity, found in the extracellular matrix. www.uniprot.org                                                                                                                                                      | 0.0505 |
| NADH:ubiquinone<br>oxidoreductase subunit A9 GN:<br>NDUFA9                           | Subunit required for complex I assembly in the electron transport chain. Mitochondrial protein. Baertling <i>et al.</i> , 2018 DOI: 10.1111/cge.13089                                                                                            | 0.051  |
| SEC13 homolog nuclear pore and<br>COPII coat complex component<br>GN: SEC13          | Involved in COPII-coated vesicle budding and protein transport from the ER. www.uniprot.org                                                                                                                                                      | 0.0512 |
| Uncharacterized protein GN:<br>LOC100514982                                          | No described function www.uniprot.org                                                                                                                                                                                                            | 0.0514 |
| L-lactate dehydrogenase C GN:<br>LDHC                                                | Testis specific isozyme found in male germ cells. Localizes to the principal piece in mature sperm but found in all spermatogenic cells. Appears to be required for fertilization. Goldberg <i>et al.</i> , 2010 DOI: 10.2164/jandrol.109.008367 | 0.0523 |
| TBC1 domain family member 21<br>GN: TBC1D21                                          | Localized to elongating spermatids during spermatogenesis, this protein appears to bind Rap1 (a protein crucial for proper spermatogenesis). Ke <i>et al.</i> , 2018 DOI: 10.3390/ijms19113292                                                   | 0.0567 |
| Uncharacterized protein GN:<br>LOC100515166                                          | IF rod domain-containing protein. Structural protein, part of the intermediate filaments. www.uniprot.org                                                                                                                                        | 0.0594 |
| Uncharacterized protein GN:<br>LOC100522130                                          | Hydrolase activity utilizes magnesium as a cofactor. www.uniprot.org                                                                                                                                                                             | 0.0636 |
| Actin like 9 GN: ACTL9                                                               | Part of the actin-based cytoskeleton. www.uniprot.org                                                                                                                                                                                            | 0.065  |
| NADH dehydrogenase<br>(ubiquinone) iron-sulfur protein 6<br>mitochondrial GN: NDUFS6 | Subunit of Complex I in the electron transport chain. Mitochondrial protein necessary for normal Complex I assembly. Kirby <i>et al.</i> , 2004 DOI: 10.1172/JCI20683                                                                            | 0.0655 |
| Uncharacterized protein GN:<br>LOC102164346                                          | FAM75 domain-containing protein. No characterized functions. www.uniprot.org                                                                                                                                                                     | 0.0665 |
| Schlafen like 1 GN: SLFN1                                                            | Testis-abundant protein. Shown to not be essential for male fertility. Park <i>et al.</i> , 2020 DOI: 10.1093/biolre/ioaa084                                                                                                                     | 0.0679 |
| Dynein regulatory complex<br>subunit 7 GN: DRC7                                      | Required for flagellum formation and male fertility. Morohoshi <i>et al.</i> , 2020 DOI: 10.1371/journal.pgen.1008585                                                                                                                            | 0.0693 |
| Uncharacterized protein GN:<br>PSMC2                                                 | Proteasome 26S subunit ATPase 2. Positively regulates RNA polymerase II complex assembly and participates in ubiquitin-dependent protein catabolism. www.uniprot.org                                                                             | 0.0694 |
| Uncharacterized protein GN:<br>PDHB                                                  | Pyruvate dehydrogenase B. Part of the pyruvate to acetyl-CoA pathway. www.uniprot.org                                                                                                                                                            | 0.0701 |
| Coiled-coil-helix-coiled-coil-helix<br>domain containing 5 GN:<br>CHCHD5             | No characterized function. www.uniprot.org                                                                                                                                                                                                       | 0.0707 |



|                                                            |                                                                                                                                                                                                                                                                                                                                            |        |
|------------------------------------------------------------|--------------------------------------------------------------------------------------------------------------------------------------------------------------------------------------------------------------------------------------------------------------------------------------------------------------------------------------------|--------|
| Actin related protein T2 GN: ACTRT2                        | Located in the post-acrosomal region and mid-piece of the sperm. Declines of this protein reduce sperm motility. Liu <i>et al</i> , 2015 DOI: 10.1111/andr.289                                                                                                                                                                             | 0.0714 |
| Keratin 4 GN: KRT4                                         | Part of the keratin filament-based components of the cytoskeleton. <a href="http://www.uniprot.org">www.uniprot.org</a>                                                                                                                                                                                                                    | 0.0714 |
| Ubiquitin thioesterase a.k.a. OTU deubiquitinase GN: OTUB1 | Known deubiquitinating enzyme. Shown to regulate p53 and promote mitochondria-mediated apoptosis. Chen <i>et al.</i> , 2017 DOI: 10.18632/oncotarget.14278                                                                                                                                                                                 | 0.0716 |
| Rhophilin associated tail protein 1 like GN: ROPN1L        | Sperm tail protein necessary for normal tail morphology and motility in sperm. Rattanachan <i>et al.</i> , 2014 DOI: 10.1016/j.actatropica.2014.08.002                                                                                                                                                                                     | 0.0716 |
| HYDIN axonemal central pair apparatus protein GN: HYDIN    | Ciliary protein associated with heart tissue. Involved in GATA4 expression within heart tissues. Cao <i>et al.</i> , 2020 DOI: 10.1016/j.mod.2020.103611                                                                                                                                                                                   | 0.0725 |
| Heat shock 70 kDa protein 1-like GN: HSPA1L                | Chaperone to HSP70 and found on the sperm plasma membrane. Naaby-Hansen & Herr 2010 DOI: 10.1016/j.jri.2009.09.006                                                                                                                                                                                                                         | 0.0727 |
| Actin like 7A GN: ACTL7A                                   | A spermatogenesis-specific actin like protein. Tanaka <i>et al.</i> , 2019 DOI: 10.22074/ijfs.2019.5702                                                                                                                                                                                                                                    | 0.0729 |
| T-complex protein 1 subunit gamma GN: CCT3                 | The t-complex protein 1 is a complex within cells which is responsible for protein folding. It is made up of 8 distinct subunits. Believed to interact with Zona-binding protein 2 and participate in sperm-zona binding. Dun <i>et al.</i> , 2011 DOI: 10.1074/jbc.M110.188888                                                            | 0.0302 |
| Uncharacterized protein Accession: A0A287AEH4              | DUF4599 domain-containing protein. Membrane component protein. <a href="http://www.uniprot.org">www.uniprot.org</a>                                                                                                                                                                                                                        | 0.0759 |
| Phosphatidylethanolamine-binding protein 4 GN: pebp4       | A secreted protein, unlike pebp1, 2, & 3. Inhibits ERK from activating EGF. Believed to participate in other pathways as well. He <i>et al</i> , 2016 DOI: 10.1016/j.bbamcr.2016.03.022                                                                                                                                                    | 0.0764 |
| Acyl-CoA synthetase long chain family member 6 GN: ACSL6   | Required form normal spermatogenesis in mice. Highly expressed in spermatids. Shishikura <i>et al.</i> , 2019 DOI: 10.1096/fj.201901074R                                                                                                                                                                                                   | 0.0774 |
| NADH-cytochrome b5 reductase GN: CYB5R1                    | Flavoprotein involved in transferring reducing equivalents from NADH using FAD. Elahian <i>et al</i> , 2012 DOI: 10.3109/07388551.2012.732031                                                                                                                                                                                              | 0.0802 |
| Calmodulin 2                                               | Calcium-mediated signaling & calcium ion binder. In stallion sperm, calmodulin plays a role in regulating sperm motility. Lasko <i>et al.</i> , 2012 DOI: 10.1016/j.anireprosci.2012.05.007                                                                                                                                                | 0.0804 |
| Dynein axonemal heavy chain 7 GN: DNAH7                    | Involved in inner dynein arm assembly and cilium movement. <a href="http://www.uniprot.org">www.uniprot.org</a>                                                                                                                                                                                                                            | 0.084  |
| NADH dehydrogenase (ubiquinone) 1 subunit C2 GN: NDUFC2    | Needed for proper mitochondrial function. Part of complex I in the electron transport chain of the mitochondria. Raffa <i>et al.</i> , 2019 DOI: 10.1016/j.ijcard.2019.02.027                                                                                                                                                              | 0.0842 |
| FUN14 domain-containing protein 2 GN: FUNDC2               | FUNDC2 binds PIP3 and works through the AKT1/BAD/ BCL2L1 axis on the mitochondrial outer membrane. BCL2L1 protects cells against apoptotic hypoxia stress. A removal of FUNDC2 would coincide with a loss of stress protection and an increase in apoptosis and possibly mitophagy. Ma <i>et al.</i> , 2018 DOI: 10.1038/s41418-018-0121-8 | 0.0845 |
| Dynein axonemal intermediate chain 2 GN: DNAI2             | Plays a role in cilium movement, & outer dynein arm assembly. <a href="http://www.uniprot.org">www.uniprot.org</a>                                                                                                                                                                                                                         | 0.0884 |

|                                                        |                                                                                                                                                                                                                                                                |        |
|--------------------------------------------------------|----------------------------------------------------------------------------------------------------------------------------------------------------------------------------------------------------------------------------------------------------------------|--------|
| A-kinase anchoring protein 3 GN: AKAP3                 | Essential for sperm motility, capacitation, and the acrosome reaction. Degraded by tyrosine phosphorylation during capacitation. Vizel <i>et al.</i> , 2015 DOI: 10.1016/j.bbagen.2015.06.005                                                                  | 0.0886 |
| Uncharacterized protein Accession: A0A287BR23          | DUF4685 domain-containing protein. No characterized function. <a href="http://www.uniprot.org">www.uniprot.org</a>                                                                                                                                             | 0.0914 |
| Angiotensin-converting enzyme GN: ACE                  | Zinc metalloproteinase, membrane protein. Important for sperm transport through the oviduct and sperm-zona pellucida binding. Likely involved in the distribution of ADAM3 for zona binding. Yamaguchi <i>et al.</i> , 2006 DOI: 10.1095/biolreprod.106.052977 | 0.094  |
| Uncharacterized protein Accession: K7GM09              | Integral component of membrane. Protein appears like: Calponin-homology domain-containing protein. <a href="http://www.uniprot.org">www.uniprot.org</a>                                                                                                        | 0.0956 |
| Outer dense fiber protein 1 GN: ODF1                   | Sperm structural protein, crucial for proper head attachment and normal connecting piece morphology. Schneider <i>et al.</i> , 2016 DOI: 10.1074/mcp.M116.060343                                                                                               | 0.0959 |
| Family with sequence similarity 71 member D GN: FAM71D | Associated with sperm motility and is found in sperm flagella. Ma <i>et al.</i> , 2017 DOI: 10.1093/humrep/dex290                                                                                                                                              | 0.0962 |
| Chromosome 3 open reading frame 84 GN: C3orf84         | HDNR domain-containing protein. No described function. <a href="http://www.uniprot.org">www.uniprot.org</a>                                                                                                                                                    | 0.0977 |
| Uncharacterized protein GN: NDUFA7                     | Mitochondrial protein, part of Complex I in the electron transport chain. Alston <i>et al.</i> , 2018 DOI: 10.1016/j.ajhg.2018.08.013                                                                                                                          | 0.0983 |
| Uncharacterized protein GN: GK                         | Converts glycerol to glycerol-3-phosphate. <a href="http://www.uniprot.org">www.uniprot.org</a>                                                                                                                                                                | 0.0985 |

210  
211  
212

**Table 2:** Proteomic identification of mitophagy and sperm remodeling cofactors in porcine cell-free system after 24 hours of co-incubation.

| Protein of Interest<br>Legend:<br>GN = Gene name<br>PE = protein existence level<br>SV = Sequence version<br>(PE and SV only included for proteins which had multiple versions in the table) | Proposed role in autophagy/mitophagy/post-fertilization sperm structure remodeling by zygote, and original references describing identified proteins' role in those events.                                                                                                                | P value based off 3 rep T-test analysis |
|----------------------------------------------------------------------------------------------------------------------------------------------------------------------------------------------|--------------------------------------------------------------------------------------------------------------------------------------------------------------------------------------------------------------------------------------------------------------------------------------------|-----------------------------------------|
| <b>CLASS 1 – Proteins detectable on spermatozoa only after extract exposure.</b>                                                                                                             |                                                                                                                                                                                                                                                                                            |                                         |
| Zona pellucida sperm-binding protein 3 GN: ZP3                                                                                                                                               | Involved in sperm-egg recognition, acrosomal reaction, and polyspermy defense. Zimmerman <i>et al.</i> , 2011 DOI: 10.1371/journal.pone.0017256                                                                                                                                            | 0.0001                                  |
| Metalloendopeptidase a.k.a. Ovastacin GN: ASTL                                                                                                                                               | Member of peptidase family involved in reproductive protein processing in <i>Drosophila</i> ; (ov)astacin is secreted by mouse oocyte to cleave zona, prevent polyspermy. Ram <i>et al.</i> , 2006 DOI: 10.1073/pnas.0606228103 ; Burkart <i>et al.</i> , 2012; DOI: 10.1083/jcb.201112094 | 0.0002                                  |
| Uncharacterized protein GN: PRDX3                                                                                                                                                            | Necessary for normal mitochondrial function. Localizes to the mitochondria after peroxide exposure and acts as a peroxide reducing agent. Wonsey <i>et al.</i> , 2002 DOI: 10.1073/pnas.102523299                                                                                          | 0.001                                   |
| Zona pellucida sperm-binding protein 4 GN: ZP4                                                                                                                                               | Involved in sperm-egg recognition, acrosomal reaction, and polyspermy defense. Zimmerman <i>et al.</i> , 2011 DOI: 10.1371/journal.pone.0017256                                                                                                                                            | 0.1837                                  |

|                                                                                                                    |                                                                                                                                                                                                                                                                                        |        |
|--------------------------------------------------------------------------------------------------------------------|----------------------------------------------------------------------------------------------------------------------------------------------------------------------------------------------------------------------------------------------------------------------------------------|--------|
| Small Calcium-binding mitochondrial carrier 1 GN: SCAMC                                                            | Protein involved in ATP-Mg/Pi transport across the inner mitochondrial membrane, in a calcium regulated manner. Arco & Satrustegui 2004 DOI: 10.1074/jbc.M401417200                                                                                                                    | 0.1839 |
| Lactamase beta GN: LACTB                                                                                           | Localized to the intermembrane space of the mitochondria. Forms long, stable filaments to create intramitochondrial membrane organization and micro-compartments within the mitochondria. Polianskyte <i>et al.</i> , 2009 DOI: 10.1073/pnas.0906734106                                | 0.1844 |
| Nucleophosmin/nucleoplasmin 2 GN: NPM2                                                                             | Sperm nucleus remodeling after fertilization. Required for histone import into paternal pronucleus. McLay & Clark., 2003 DOI: 10.1530/rep.0.1250625                                                                                                                                    | 0.1861 |
| Zona Pellucida sperm-binding protein 2 GN: ZP2                                                                     | Involved in sperm-egg recognition, acrosomal reaction, and polyspermy defense. Zimmerman <i>et al.</i> , 2011 DOI: 10.1371/journal.pone.0017256                                                                                                                                        | 0.1875 |
| Peptidyl arginine deiminase 6 GN: PADI6                                                                            | Essential for early zygotal development, specifically cytoskeletal sheet formation through citrullination. Essential for female fertility. Esposito <i>et al.</i> , 2007 DOI: 10.1016/j.mce.2007.05.005                                                                                | 0.1875 |
| Major Vault Protein GN: MVP                                                                                        | Regulates cell growth and survival through the STAT3 and Akt signaling pathways. Das <i>et al.</i> , 2016 DOI: 10.1016/j.cellsig.2015.10.007                                                                                                                                           | 0.1889 |
| <b>CLASS 2 - Detected in the vehicle and primed control spermatozoa, increased in extract-exposed spermatozoa.</b> |                                                                                                                                                                                                                                                                                        |        |
| Uncharacterized protein GN: HMGB3                                                                                  | Positively regulates transcription through RNA polymerase II. Located in the nucleus. www.uniprot.org                                                                                                                                                                                  | 0.0039 |
| Myeloid leukemia factor 1 GN: MLF1                                                                                 | Negatively regulates the HOP mitochondrial protein complex to regulate cell survival. Serves as a proapoptotic antagonist. Sun <i>et al.</i> , 2017 DOI: 10.1016/j.bbamcr.2017.01.016                                                                                                  | 0.005  |
| PHD finger protein 7 GN: PHF7                                                                                      | Plays a role in histone-to-protamine exchange during spermiogenesis. Appears to begin the ubiquitylation of H2A in round spermatids. Wang <i>et al.</i> , 2019 DOI: 10.1242/dev.175547                                                                                                 | 0.0063 |
| Spermatogenesis associated 24 GN: SPATA24                                                                          | DNA binding protein. Located in cytosol and nucleus. www.uniprot.org                                                                                                                                                                                                                   | 0.0122 |
| Uncharacterized protein GN: C12H17orf100                                                                           | No characterized function www.uniprot.org                                                                                                                                                                                                                                              | 0.0315 |
| Ubiquitin specific peptidase 50 GN: USP50                                                                          | A deubiquitinating enzyme which regulates the cell cycle through prevention of Wee1 degradation. USP50 interacts with HSP90 and accumulates after DNA damage. It's believed to prevent entry into mitosis following DNA damage. Aressy <i>et al.</i> , 2010 DOI: 10.4161/cc.9.18.13133 | 0.0333 |
| Proteasome subunit alpha type GN: PSMA8                                                                            | A testis specific proteasomal subunit found during spermatogenesis. Appears crucial for proper meiotic exit by the forming spermatids. Gomez-H <i>et al.</i> , 2019 DOI: 10.1371/journal.pgen.1008316                                                                                  | 0.046  |
| Chromosome 2 open reading frame 70 GN: C2orf70                                                                     | No characterized function www.uniprot.org                                                                                                                                                                                                                                              | 0.0487 |
| Theg spermatid protein GN: THEG                                                                                    | Testicular haploid expressed gene. Thought to only be expressed in spermatid cells. Though not essential for spermatogenesis it is thought to participate in                                                                                                                           | 0.0872 |

|                                                                                                   |                                                                                                                                                                                                                              |          |
|---------------------------------------------------------------------------------------------------|------------------------------------------------------------------------------------------------------------------------------------------------------------------------------------------------------------------------------|----------|
|                                                                                                   | Sertoli cell and spermatid interactions. Mannan <i>et al.</i> , 2003 DOI: 10.1095/biolreprod.103.017400                                                                                                                      |          |
| Proteasome assembly chaperone 2 GN: PSMG2                                                         | Interacts closely with PAC1 and they help ensure proper proteasome core formation, acting as a quality control mechanism. Wu <i>et al.</i> , 2018 DOI: 10.1111/gtc.12631                                                     | 0.0878   |
| <b>CLASS 3 – Proteins detected in spermatozoa before extract, reduced after extract exposure.</b> |                                                                                                                                                                                                                              |          |
| Creatine Kinase B-type GN: CKB                                                                    | Part of the phosphocreatine biosynthetic pathway. Binds ATP and produces N-phosphocreatine. www.uniprot.org                                                                                                                  | 0.000043 |
| Platelet-activating factor acetylhydrolase IB subunit alpha GN: PAFAH1B1                          | Plays a role in spermatogenesis and is found in the acrosome and midpiece of spermatozoa. However, it is also found in the membrane of oocytes and zygotes. Yao <i>et al.</i> , 2015 DOI: 10.1016/j.rbmo.2015.07.010         | 0.0039   |
| Electron transfer flavoprotein subunit beta GN: ETFB                                              | Mitochondrial protein that is part of the electron transport chain. Serves as an electron acceptor molecule. Schmiesing <i>et al.</i> , 2014 DOI: 10.1371/journal.pone.0087715                                               | 0.0121   |
| Chromosome 17 open reading frame 98 GN: C17orf98                                                  | No characterized function. www.uniprot.org                                                                                                                                                                                   | 0.0121   |
| Glutamate-cysteine ligase modifier subunit GN: GCLM                                               | Regulates mitochondrial depolarization and participates in the glutathione biosynthetic pathway. www.uniprot.org                                                                                                             | 0.0125   |
| Serotransferrin GN: TF                                                                            | Modulates interactions between endosomes and mitochondria. Das <i>et al.</i> , 2016 DOI: 10.1083/jcb.201602069                                                                                                               | 0.0177   |
| L-lactate dehydrogenase B chain GN: LDHB                                                          | When deacetylated by SIRT5, autophagy is promoted. Shi <i>et al.</i> , 2019 DOI: 10.1002/1878-0261.12408                                                                                                                     | 0.0184   |
| Uncharacterized protein GN: LOC396905                                                             | Sperm-associated acrosin inhibitor isoform X1. No characterized function. www.uniprot.org                                                                                                                                    | 0.0199   |
| Receptor of activated protein C kinase 1 GN: RACK1                                                | Ribosomal protein located on the small ribosomal subunit and appears to regulate translation. Gallo <i>et al.</i> , 2018 DOI: 10.1128/MCB.00230-18                                                                           | 0.0203   |
| Radial spoke head 14 homolog GN: RSPH14                                                           | No characterized function. www.uniprot.org                                                                                                                                                                                   | 0.0218   |
| Eukaryotic translation initiation factor 4E GN: EIF4E                                             | Reduces an apoptotic susceptibility via an inhibition of mitochondrial cytochrome c release. Li <i>et al.</i> , 2003 DOI: 10.1074/jbc.M208821200                                                                             | 0.024    |
| Lactotransferrin GN: LTF                                                                          | Iron-binding glycoprotein. Regulates iron absorption, & immune responses. Hao <i>et al.</i> , 2019 DOI: 10.2174/1389203719666180514150921                                                                                    | 0.0279   |
| Transducin beta like 2 GN: TBL2                                                                   | Localizes to the endoplasmic reticulum and interacts with the 60S ribosomal subunit. Also works with PERK during ER stress. Tsukumo <i>et al.</i> , 2015 DOI: 10.1016/j.bbrc.2015.04.144                                     | 0.0312   |
| Histone H2A GN: HIST2H2AB                                                                         | A histone 2A variant which confers specific properties to the nucleosome. Plays a dominant role in chromatin dynamics and function. Osakabe <i>et al.</i> , 2018 DOI: 10.1093/nar/gky540                                     | 0.0342   |
| Adenylate cyclase 3 GN: ADCY3                                                                     | Required for normal spermatozoa function. Plays a role in male fertility and appears to localize to the acrosomal membrane, may play a role in the acrosomal reaction. Livera <i>et al.</i> , 2005 DOI: 10.1210/me.2004-0318 | 0.0358   |
| Retinoic acid receptor responder 1 GN: RARRES1                                                    | Metalloendopeptidase inhibitor activity, found in the extracellular matrix. www.uniprot.org                                                                                                                                  | 0.0401   |
| Spermatogenesis-associated protein 20 GN: SPATA20                                                 | Participates in DNA damage response in male germ cells. Facilitates DNA repair. Zheng <i>et al.</i> , 2017 DOI: 10.1371/journal.pone.0178535                                                                                 | 0.0469   |

|                                                                |                                                                                                                                                                                                                                             |        |
|----------------------------------------------------------------|---------------------------------------------------------------------------------------------------------------------------------------------------------------------------------------------------------------------------------------------|--------|
| ADP ribosylation factor like GTPase 1 GN: ARL1                 | Involved in endosomal trans-Golgi network and secretory traffic, lipid droplet formation, innate immunity, stress tolerance and unfolded protein response. Yu & Lee 2017 DOI: 10.1242/jcs.201319                                            | 0.0536 |
| Glycerol-3-phosphate dehydrogenase (NAD[+]) GN: GPD1L          | Converts glycerol 3-phosphate into dihydroxyacetone phosphate. Part of the carbohydrate metabolic process. www.uniprot.org                                                                                                                  | 0.0563 |
| G protein subunit beta 2 GN: GNB2                              | Binds the G-protein gamma-subunit & GTPases. Part of the G protein-coupled receptor signaling pathway. www.uniprot.org                                                                                                                      | 0.0593 |
| IQ motif containing F2 GN: IQCF2                               | Binds calmodulin. www.uniprot.org                                                                                                                                                                                                           | 0.0623 |
| RAB3B member RAS oncogene family GN: RAB3B                     | Involved in various cellular pathways. Has GTPase activity and binds myosin. www.uniprot.org                                                                                                                                                | 0.0634 |
| Uncharacterized protein GN: MS4A14                             | Found during spermatogenesis in round spermatids to spermatozoa. Localized to the acrosome and midpiece. Involved in fertilization and zygotic division. Xu <i>et al.</i> , 2014 DOI: 10.1530/REP-14-0087                                   | 0.0643 |
| Keratin 14 GN: KRT14                                           | Part of the intermediate filament portion of the cytoskeleton. www.uniprot.org                                                                                                                                                              | 0.0673 |
| Endosome associated trafficking regulator 1 GN: ENTR1          | Controls Fas-mediated apoptotic signaling via binding to Dysbindin. Sharma <i>et al.</i> , 2019 DOI: 10.1038/s41467-019-11025-y                                                                                                             | 0.0691 |
| NME/NM23 family member 5 GN: NME5                              | Involved in spermatid development, flagellum assembly, and acts as a nucleoside diphosphate kinase. www.uniprot.org                                                                                                                         | 0.07   |
| Deoxythymidylate kinase GN: DTYMK                              | Part of the mitochondrial nucleotide salvage pathway. Mutations in this gene cause mitochondrial DNA depletion syndrome. Lam <i>et al.</i> , 2019 DOI: 10.1016/j.cca.2019.06.028                                                            | 0.0714 |
| Rho GDP dissociation inhibitor alpha GN: ARHGDI A              | Regulates protein localization, part of the Rho and semaphoring-plexin signaling pathways. www.uniprot.org                                                                                                                                  | 0.0722 |
| Thioredoxin domain containing 17 GN: TXNDC17                   | Peroxidase and protein-disulfide reductase activities. www.uniprot.org                                                                                                                                                                      | 0.0756 |
| Keratin 7 GN: KRT7                                             | Part of the keratin-based cytoskeleton. www.uniprot.org                                                                                                                                                                                     | 0.0777 |
| Uncharacterized protein Accession: AOA287BM70                  | UPAR/Ly6 domain-containing protein. www.uniprot.org                                                                                                                                                                                         | 0.0796 |
| Uncharacterized protein GN: LOC100738961                       | No characterized function. www.uniprot.org                                                                                                                                                                                                  | 0.0827 |
| GTP-binding protein SAR1a GN: SAR1A                            | Part of the COPII-coated vesicle transporting system. GTPase activity. www.uniprot.org                                                                                                                                                      | 0.0834 |
| ATP binding cassette subfamily E member 1 GN: ABCE1            | Undergoes ubiquitination by NOT4 in response to mitochondrial damage. Acts as translational quality control. Showing that PINK1-directed mitophagy influences translation in cells. We <i>et al.</i> , 2018 DOI: 10.1016/j.cmet.2018.05.007 | 0.0856 |
| Sarcoplasmic/endoplasmic reticulum calcium ATPase 2 GN: ATP2A2 | Plays roles in calcium ion homeostasis, organelle organization, response to oxidative stress and ER transport. www.uniprot.org                                                                                                              | 0.0876 |
| Uncharacterized protein GN: LOC100515166                       | IF rod domain-containing protein. A structural protein, part of the intermediate filaments. www.uniprot.org                                                                                                                                 | 0.0891 |
| 60S acidic ribosomal protein P0 GN: RPLP0                      | When depleted, PLAAT4 induced cell cycle arrest and cell death are increased. Wang <i>et al.</i> , 2019 DOI: 10.1007/s12013-019-00876-3                                                                                                     | 0.0891 |

|                                                                 |                                                                                                                                                                                                                           |        |
|-----------------------------------------------------------------|---------------------------------------------------------------------------------------------------------------------------------------------------------------------------------------------------------------------------|--------|
| Tctex-type 1 dynein light chain<br>GN: DYNLT1                   | Necessary for male germ cell development. Known to be involved in protein trafficking, membrane vesiculation, cell cycle regulation and stem cell differentiation. Indu <i>et al.</i> , 2015 DOI: 10.1074/mcp.M115.050005 | 0.0959 |
| Uncharacterized protein<br>Accession: F1SL35                    | Glutathione transferase. Part of the glutathione metabolic process. www.uniprot.org                                                                                                                                       | 0.0977 |
| Eukaryotic translation<br>elongation factor 2 GN: EEF2          | Catalyzes reverse localization of the ribosome. Susorov <i>et al.</i> , 2018 DOI: 10.1074/jbc.RA117.000761                                                                                                                | 0.0982 |
| Uncharacterized protein GN:<br>ZG16B                            | Depletion increases aneuploidy, promotes apoptosis, and activates the Wnt/Beta-catenin pathway. Escudero-Paniagua <i>et al.</i> , 2020 DOI: 10.1093/carcin/bgz093                                                         | 0.0991 |
| Uncharacterized protein GN:<br>KRT8                             | When phosphorylated, this protein induces autophagy impairment by affecting the fusion of autophagosomes and lysosomes. Miao <i>et al.</i> , 2020 DOI: 10.1111/jcmm.14998                                                 | 0.0994 |
| NADH:ubiquinone<br>oxidoreductase core subunit S8<br>GN: NDUFS8 | Part of complex I in the mitochondrial respiratory chain. www.uniprot.org                                                                                                                                                 | 0.0997 |

213

### 214 **Investigation of candidate proteins in the porcine cell-free system**

215 Six candidate proteins were selected from the mass spectrometry results for further investigation.  
216 These six proteins were MVP, PSMG2, PSMA3, FUNDC2, SAMM50, and BAG5. Western blot detection and  
217 immunocytochemistry were used to describe the presence and localization patterns of these candidate  
218 proteins in ejaculated, primed, and cell-free treated spermatozoa. Furthermore, immunocytochemistry was  
219 used to observe the localization of these proteins in *in vitro* derived porcine zygotes. Oocytes were fertilized  
220 with spermatozoa pre-labeled with MitoTracker so that mitochondrial sheaths could be detected. These  
221 oocytes, now presumed zygotes, were then collected at 15 and 25 hours post insemination (sperm and  
222 oocytemixing). These time points were selected to ensure that post-fertilization sperm mitophagy was well  
223 underway in the zygotes at both timepoints. Furthermore, the 25 hour time point was selected to observe the  
224 advanced stages of mitophagy post-gamete mixing. These presumed zygotes were then fixed and stained for  
225 immunocytochemistry.

### 226 **MVP**

227 Major vault protein was identified as a Class 1 protein of interest in our MS trials. It was not identified  
228 in vehicle control spermatozoa or primed control sperm samples. However, it was identified in oocyte extracts  
229 and in spermatozoa exposed to the cell-free system at both the 4- and 24-hour times points. Upon further  
230 investigation we confirmed that MVP was not detected in ejaculated spermatozoa by using both Western  
231 blotting and immunocytochemistry detection methods (**Figure 3A, B**). Additionally, after priming the  
232 spermatozoa, MVP was still not detected (**Figure 3C**). However, consistent with MS observations, MVP was  
233 detected on the tails of treated spermatozoa after both 4 and 24 hours of cell-free system exposure (**Figure**  
234 **3D, E**). In zygotes 15 hours post insemination MVP was detected abundantly in the cytoplasm as reported  
235 previously (Sutovsky *et al.*, 2005) though it did not appear to be associating with forming male pronuclei (PN)  
236 or with the mitochondrial sheaths of the fertilizing spermatozoa (**Figure 3F**). At 25 hours post insemination,  
237 MVP was still detectable in the cytoplasm of the zygote and did appear to have colocalization on the MS of the  
238 fertilizing spermatozoa (**Figure 3G**).



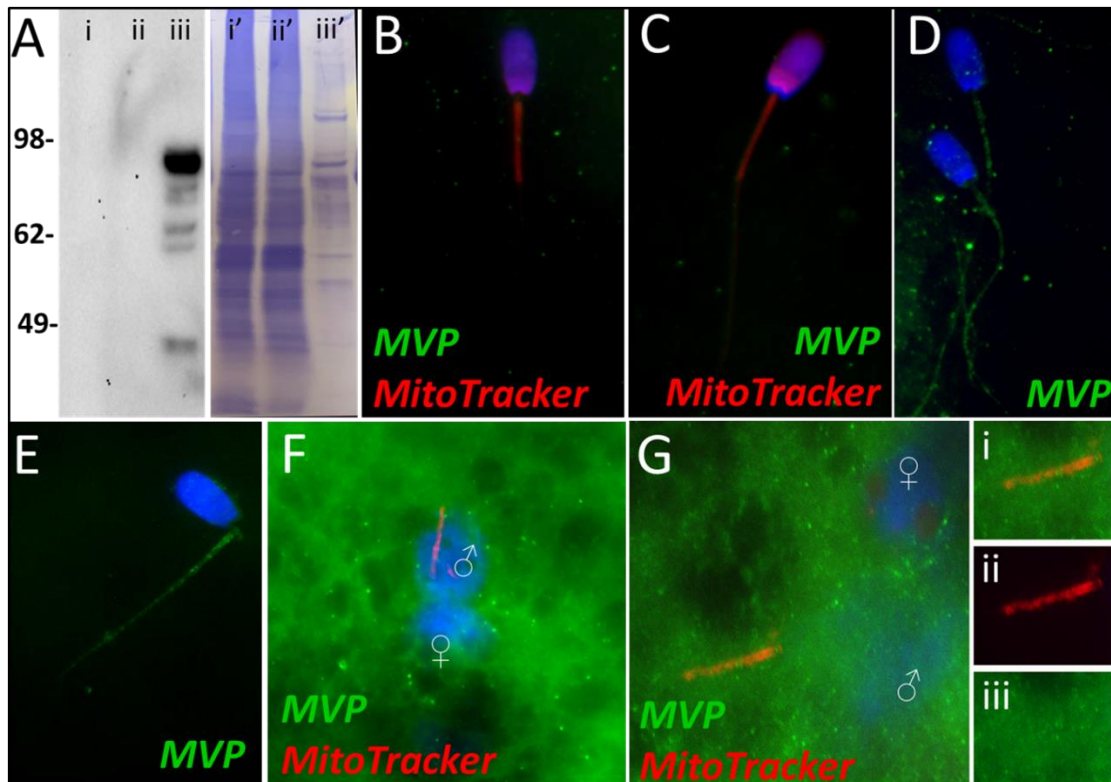

**Figure 3.** MVP in the porcine cell-free system. Major vault protein was not detected in ejaculated (Lane i) or capacitated spermatozoa (Lane ii) via Western blot detection, but it was detected in oocytes (Lane iii) (A; predicted mass = 99 kDa); (Lanes i', ii', iii') On the right side of panel A, PVDF membrane stained with Coomassie brilliant blue after chemiluminescence detection shows protein loads within each lane. MVP was not detected in ejaculated (B) or primed spermatozoa (C) via immunocytochemistry. After both 4 and 24 hours of cell-free system exposure, MVP (green) was then detected throughout the tail of the treated spermatozoa (D and E). MVP was detected in the cytoplasm of zygotes 15 hours post insemination but did not appear to associate with the pronuclei or MS (F). MVP was still detected in the cytoplasm of zygotes 25 hours post insemination and did appear to have some association with the MS of the fertilizing spermatozoa (G). A zoomed in cutout of the MS can be found in (Gi). The MS is shown by MitoTracker labeling in red channel separation panel (Gii). The green/protein labeling channel separation is shown in (Giii).

### **PSMG2**

During our MS trials, proteasome assembly chaperone 2 was identified as a Class 2 protein during the 24-hour trial. PSMG2 was found to undergo a significant increase in abundance after 24 hours in the cell-free system ( $p=0.088$ ). However, during the 4-hour trial, PSMG2 increased during two of the replicates but underwent a decrease in one of the replicates and was thus not found to be significant. PSMG2 was detected in ejaculated spermatozoa via WB (Figure 4A) and found to localize to the acrosome of ejaculated spermatozoa (Figure 4B). After priming, PSMG2 was still detected in the head of spermatozoa (Figure 4C). After 4 hours of cell-free system co-incubation PSMG2 was detected in both the head and principal piece of the sperm tail. (Figure 4D). After 24 hours of cell-free system exposure, this tail localization was no longer present and PSMG2 is found only on the partially decondensed (as a result of oocyte extract inducing sperm nucleus remodeling) heads of the spermatozoa (Figure 4E). When observed in zygotes 15 hours post insemination PSMG2 had begun to cluster around the newly forming paternal, sperm-derived pronuclei (Figure 4F). At 25 hours post insemination, a robust cluster of PSMG2 was detected surrounding the male pronuclei and on the mitochondrial sheath of the fertilizing spermatozoa (Figure 4G).

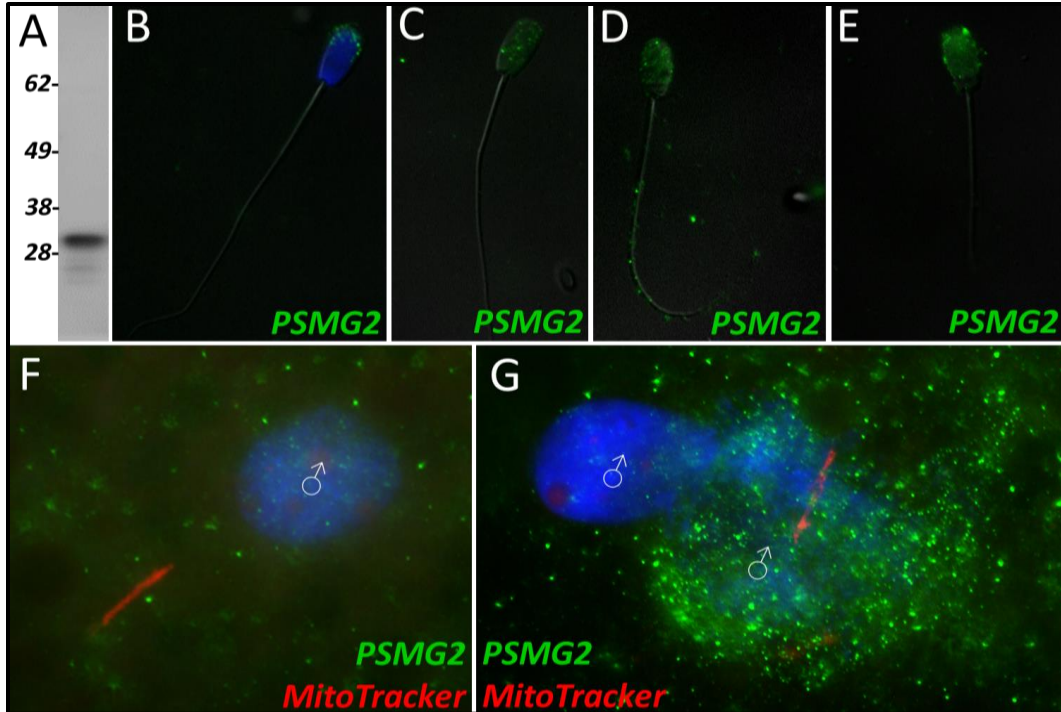

265  
266  
267  
268  
269  
270  
271  
272  
273  
274  
**Figure 4.** PSMG2 in the porcine cell-free system. Proteasomal assembly chaperone 2 was detected in ejaculated spermatozoa using Western blotting (A; predicted mass = 29 kDa), and immunocytochemistry (green) (B), where it was found to localize to the acrosome. In primed spermatozoa, PSMG2 was spread throughout the entire head (C). After 4 hours of cell-free system exposure, this same localization pattern was detected in the sperm head, but PSMG2 was also localized to the principal piece of the tail (D). After 24 hours of cell-free system exposure, PSMG2 was only detected in the head of the treated spermatozoa (E). PSMG2 was detected around the new forming paternal pronuclei in zygotes 15 hours post insemination (F). PSMG2 is detected robustly localizing to the paternal pronuclei and the MS of the fertilizing spermatozoa in this polyspermic zygote, 25 hours post insemination (G). Note that the larger, more developed PN on the right has the majority of the PSMG2 labeling.

### 275 **PSMA3**

276 Proteasome subunit alpha 3 significantly increased ( $p=0.015$ ) during the 4-hour MS trials and was  
277 categorized as a Class 2 protein. During our 24-hour MS trial, PSMA3 was found to undergo an increase during  
278 two of the replicates but displayed a decrease in one of the replicates. PSMA3 was detected in ejaculated  
279 spermatozoa by using both WB (Figure 5A) and immunocytochemistry detection (Figure 5B); it was found to  
280 localize to the acrosome of the ejaculated spermatozoa. After priming, PSMA3 was found in the tail of the  
281 spermatozoa, including midpiece and principal piece (Figure 5C). This localization pattern persisted after 4  
282 hours of cell-free system exposure (Figure 5D). After 24 hours of cell-free system exposure, PSMA3 was still  
283 detected throughout the tail but with a more focused/prevalent localization pattern on the MS (Figure 5E). In  
284 zygotes 15 hours post insemination PSMA3 clustered around the nascent paternal pronuclei and on the  
285 mitochondrial sheath of the fertilizing spermatozoa (Figure 5F). This same localization pattern persisted 25  
286 hours post insemination and PSMA3 continued to cluster near the male and female pronuclei and on the MS  
287 of fertilizing spermatozoa (Figure 5G).  
288

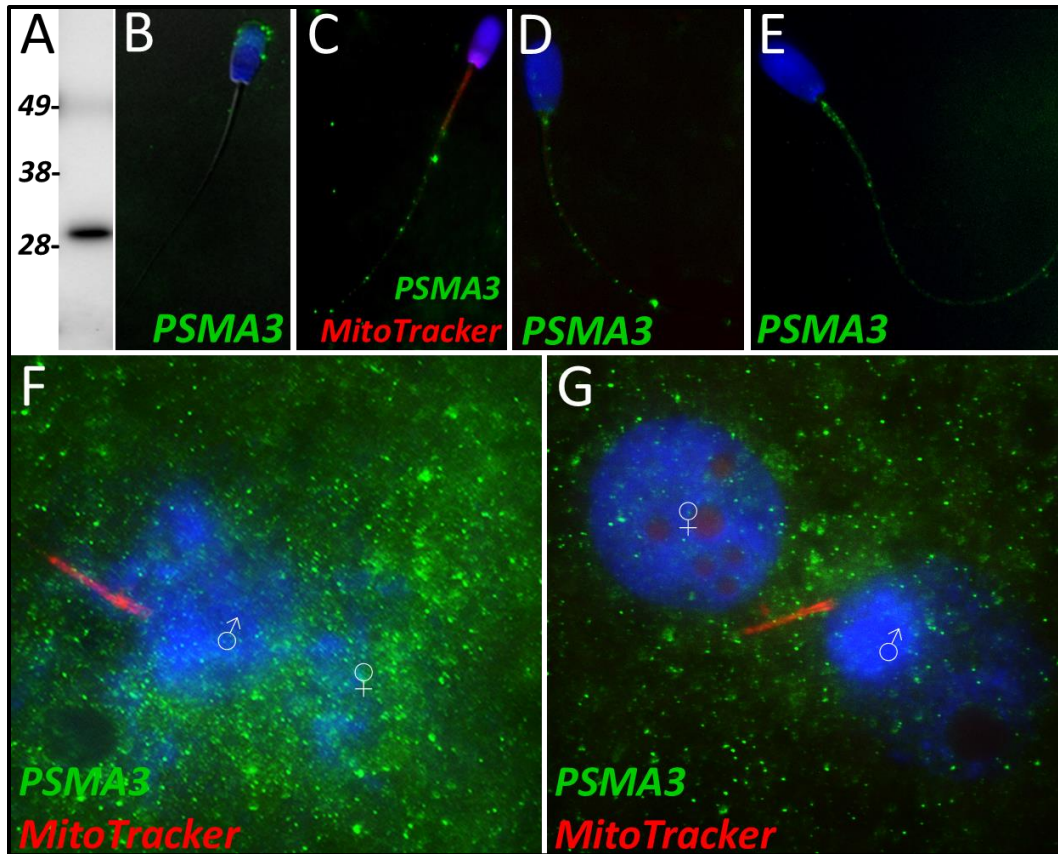

**Figure 5.** PSMA3 in the porcine cell-free system. Proteasomal subunit alpha 3 was detected in ejaculated spermatozoa via Western blotting detection (A; predicted mass = 28.4 kDa). PSMA3 (green) was localized to the acrosome of ejaculated spermatozoa by immunocytochemistry (B). After the priming process, PSMA3 was detected in the tail of primed spermatozoa (C). This same tail localization pattern was observed after both 4 and 24 hours of cell-free system exposure (D and E). PSMA3 was detected in zygotes both 15 and 25 hours post insemination (F and G); it was detected surrounding the male and female pronuclei as well as on the mitochondrial sheath of the fertilizing spermatozoa.

## **FUNDC2**

FUN14 domain-containing protein 2, a Class 3 protein in our classification, was observed to undergo a significant decrease in abundance after 4 hours of cell-free system exposure ( $p=0.084$ ). No significant change in the abundance of FUNDC2 was detected during the 24-hour trial. During our 24-hour MS trial, FUNDC2 was found to undergo a reduction during two of the replicates but displayed a slight increase in one of the replicates. FUNDC2 was detected in ejaculated spermatozoa via WB detection (Figure 6A). In ejaculated spermatozoa, FUNDC2 was detected in the acrosome and equatorial segment of the sperm head and was confined to MS within the sperm tail (Figure 6B). After sperm capacitation, FUNDC2 changed its localization and was found primarily in the apical ridge of the acrosome but also in the MS (Figure 6C). After the removal of disulfide bonds via priming, FUNDC2 was predominantly detected in the MS of primed spermatozoa compared to ejaculated and capacitated spermatozoa and was still detected on the remnants of the acrosome (Figure 6D). Upon 4 hours of cell-free system exposure, FUNDC2 was found to localize throughout the entire tail of the spermatozoa (Figure 6E). Interestingly, after 24 hours of cell free system exposure, FUNDC2 was again confined to the MS of the spermatozoa but appeared to have a fractured pattern, perhaps revealing the remaining mostly intact mitochondria or vice versa, i.e., it may be localized to those mitochondria which have undergone the greatest degree degradation at this time point (Figure 6F).



313  
314  
315  
316  
317

FUNDC2 was not detected on or near the fertilizing spermatozoa at 15 hours post insemination (Figure 6G); in contrast FUNDC2 was still detected in the head and tail of a spermatozoa bound to the zona pellucida of a zygote at the same time point (Figure 6H). FUNDC2 was also not observed localizing on or near the fertilizing spermatozoa at 25 hours post insemination but was detected in non-fertilizing, zona bound spermatozoa at the same time point (Figure 6I,J).

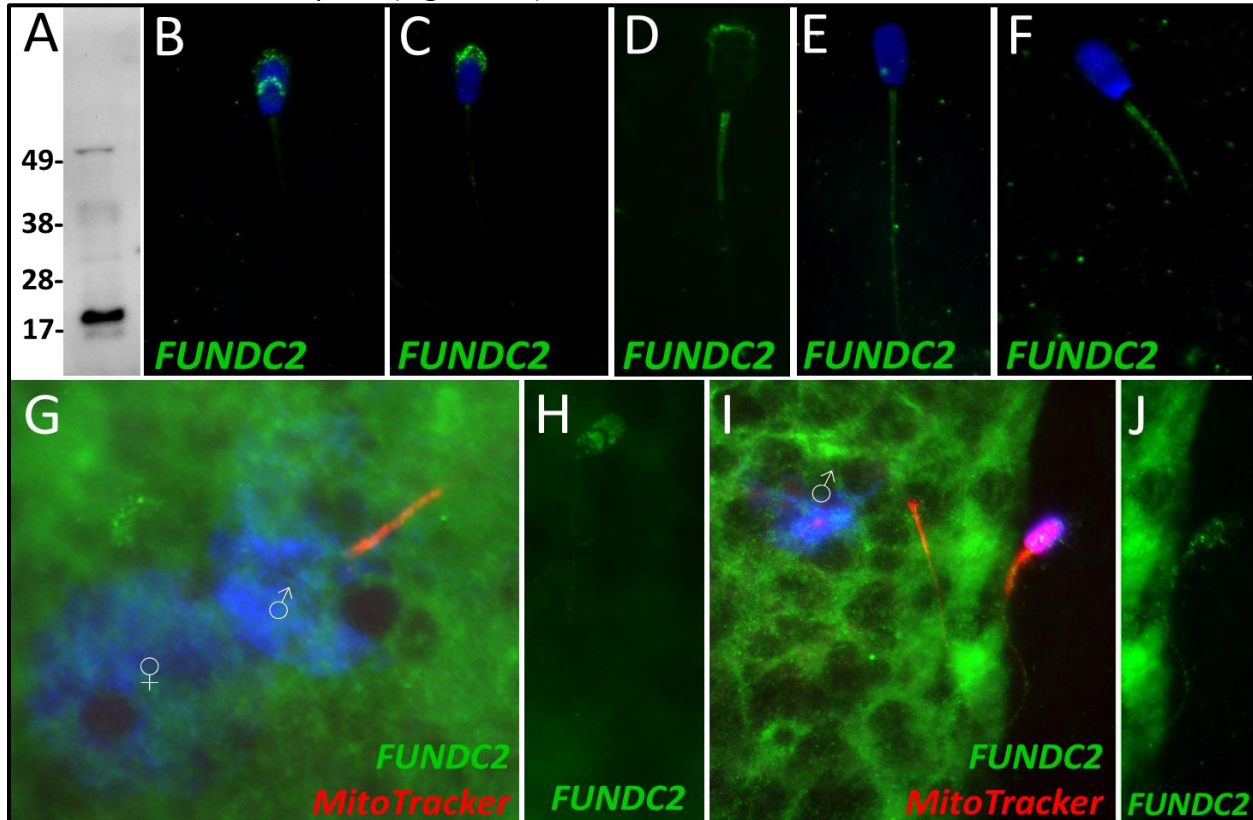

318  
319  
320  
321  
322  
323  
324  
325  
326  
327  
328  
329

**Figure 6.** FUNDC2 in the porcine cell-free system. FUNDC2 was detected in ejaculated spermatozoa by Western blotting (A; predicted mass = 20.7 kDa). FUNDC2 was detected in the acrosome and equatorial segment of ejaculated spermatozoa (B) and the acrosome and MS of capacitated spermatozoa (C). In primed spermatozoa, FUNDC2 was detected in the MS and the remnants of the acrosome (D). After 4 hours of cell-free system exposure, FUNDC2 was detected throughout the tail of the treated spermatozoa (E), and after 24 hours of cell-free system exposure, FUNDC2 was detected in the MS of treated spermatozoa (F). FUNDC2 was not detected localizing to the fertilizing sperm components in zygotes 15 hours post insemination (G). In contrast, a zona bound spermatozoa at that same time point had FUNDC2 localized throughout the head and some tail localization as well (H). FUNDC2 was not detected localizing to the fertilizing sperm components in zygotes 25 hours post insemination (I), but a non-fertilizing spermatozoon bound to the oolemma at this same time point still had some FUNDC2 labeling in its tail and head, as shown by a fluorescent channel separated cutout (J).

330  
331  
332  
333  
334  
335  
336  
337  
338

### **SAMM50**

Sorting and assembly machinery component 50 was observed to undergo a significant decrease in abundance during the 4-hour MS trial ( $p=0.035$ ), classifying it as a Class 3 protein. This decrease in abundance was not observed during the 24-hour MS trial wherein SAMM50 underwent a reduction within two of the replicates but underwent a slight increase in one of the replicates. SAMM50 was detected in spermatozoa via WB and immunocytochemistry (Figure 7A and B); it was found to localize to the acrosome and MS of the sperm tail. After priming, this same localization pattern persisted on the MS and in what remained of the acrosome and appeared to localize to the principal piece as well (Figure 7C). After 4 hours of co-incubation within the cell-free system, SAMM50 was completely removed from the remnants of the acrosome, but still

339 found throughout the tail with the greatest density of localization on the MS as seen in primed spermatozoa  
340 as well, due to acrosome removal by priming (**Figure 7D**). This same localization pattern was observed after 24  
341 hours of cell-free system co-incubation (**Figure 7E**). During our zygote trial, SAMM50 was observed localizing  
342 on and near the MS of the fertilizing spermatozoa at 15 hours post insemination (**Figure 7F**). SAMM50 was  
343 also detected 25 hours post insemination localizing to the principal piece of the fertilizing spermatozoa, but no  
344 longer on the MS (**Figure 7G**).  
345

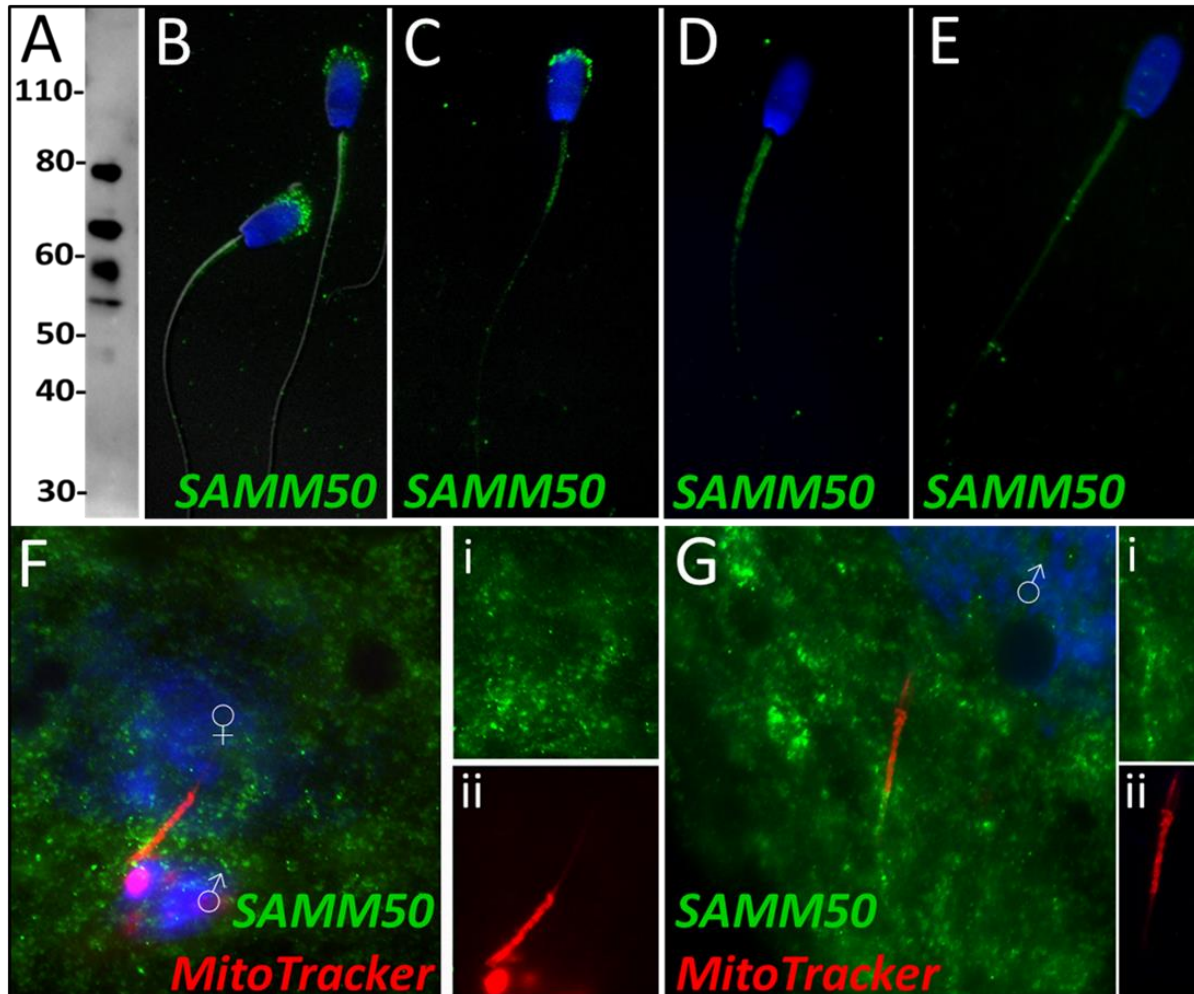

346 **Figure 7.** SAMM50 in the porcine cell-free system. Sorting and assembly machinery component 50 was detected in ejaculated  
347 spermatozoa using Western blotting (**A**; predicted mass = 51 kDa). SAMM50 has predicted post translational modifications, including  
348 phosphorylation sites and ubiquitination sites, as predicted using the MuSite Deep prediction software which likely explains the  
349 higher bands which are observed. SAMM50 was also detected in ejaculated spermatozoa using immunocytochemistry and found to  
350 localize to the acrosome and the MS of the sperm tail (**B**). In primed spermatozoa, SAMM50 was detected in the remnants of the  
351 acrosome, as well as in the MS, and the principal piece (**C**). After 4 hours of cell-free system exposure, SAMM50 was detected  
352 predominantly in the MS with some signal present in the principal piece of the sperm tail as well (**D**). After 24 hours of cell-free  
353 system exposure, SAMM50 was detected in predominantly in the MS, still with residual principal piece labelling as well (**E**). SAMM50  
354 was detected in zygotes 15 hours post insemination (**F**). It was detected on and near the MS of the fertilizing spermatozoa.  
355 Fluorescence channel separation cutouts of the MS and principal piece is shown in (**Fi**; green SAMM50) and (**Fii**; red MitoTracker).  
356 SAMM50 was also detected in zygotes 25 hours post insemination (**G**). It was detected on the principal piece of the tail of the  
357 fertilizing spermatozoa, just below the MS. Fluorescence channel separation cutouts of the MS and principal piece remnants is  
358 shown in (**Gi**; green SAMM50) and (**Gii**; red MitoTracker).  
359  
360

## BAG5

Based on quantitative proteomics, BAG family molecular chaperone regulator 5 underwent a decrease in abundance during the 4-hour MS trial ( $p=0.02$ ). However, this level of significance was not observed during the 24-hour MS trial. During our 24-hour MS trial, BAG5 underwent a reduction during two of the replicates but a slight increase in one of the replicates. Upon further investigation, BAG5 was detected by Western blotting (**Figure 8A**) and immunocytochemistry (**Figure 8B**) in fresh ejaculated spermatozoa, where it was localized exclusively to the acrosome. After priming, BAG5 was only detectable in the remains of the acrosome and weakly on the sperm tail (**Figure 8C**). After 4 hours of co-incubation within the cell-free system, BAG5 was no longer detected on the head of the spermatozoa but became detectable on the MS of the spermatozoa (**Figure 8D**). Likewise, after 24 hours of co-incubation within the cell-free system, this same BAG5 localization to the MS remained (**Figure 8E**). BAG5 was not observed localizing on the fertilizing spermatozoa 15 hours post insemination, though BAG5 did appear to be present in the cytoplasm of the zygote (**Figure 8F**). In zygotes at 25 hours post insemination, BAG5 was still not observed on the fertilizing spermatozoa, but remained present within the cytoplasm of the zygote (**Figure 8G**).

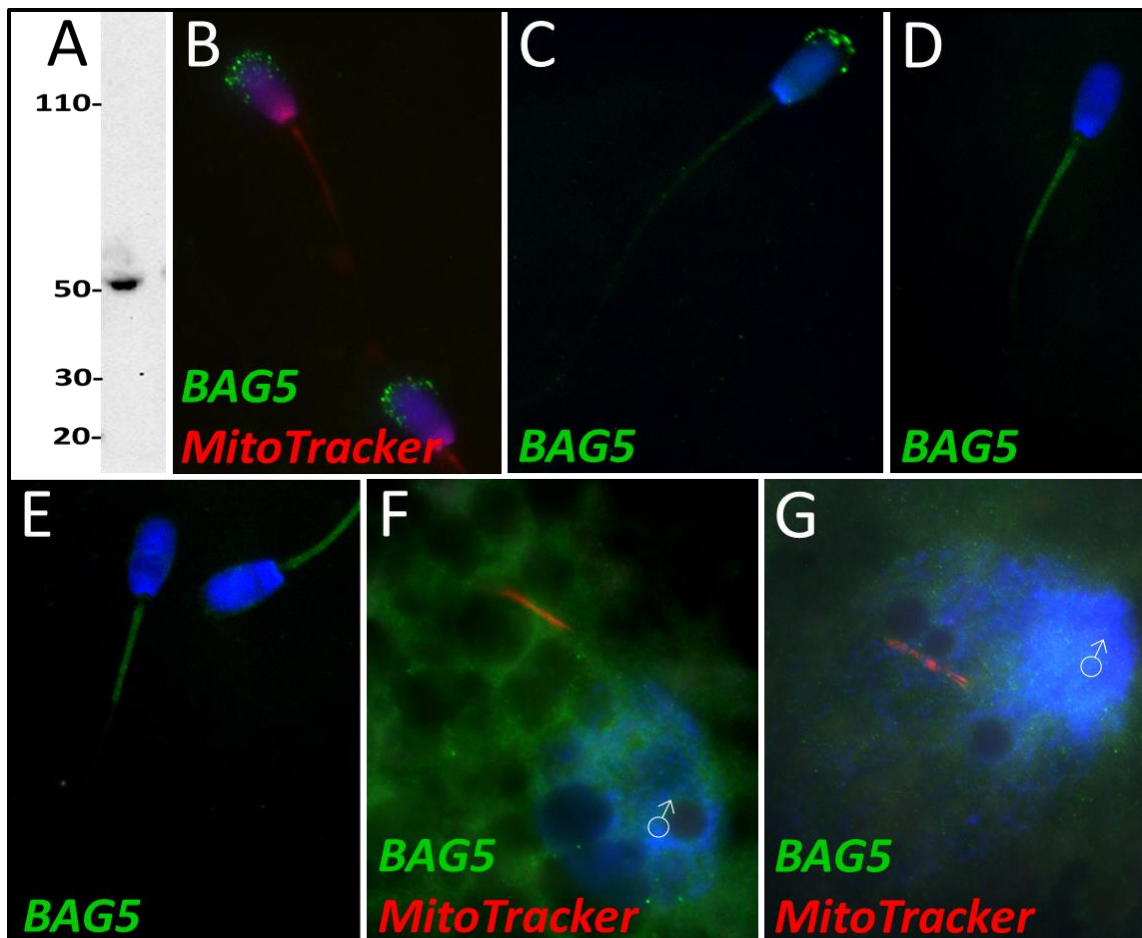

**Figure 8.** BAG family molecular chaperone regulator 5 was detected in ejaculated spermatozoa via WB (**A**; predicted mass = 54 kDa) and immunocytochemistry (**B**), where it was detected to localize in the acrosome. After priming, BAG5 still remained localized to what remained of the acrosome (**C**). After 4 and 24 hours of cell-free system exposure, BAG5 was detected in the MS of the treated spermatozoa (**D** and **E**). BAG5 was detected in the cytoplasm in zygotes 15 hours post structures (**F**) and 25 hours post fertilization, with no obvious association with the fertilizing sperm structures or their remnants (**G**).



## Discussion

In the last decade, considerable effort has been put forth to better understand the autophagic pathway's involvement in mitochondrial inheritance (Al Rawi et al., 2011; Politi et al., 2014; Sato & Sato, 2011; W. H. Song et al., 2016; Zhou et al., 2011). Much headway has been made; however, the knowledge gaps surrounding this post-fertilization sperm mitophagy process remain wide. For example, at present, it is not understood what determines species specificity or timing of sperm mitophagy. It has been observed that mammalian interspecies crosses retain the paternal mitochondria in F1 generation and become heteroplasmic as a result (Kaneda et al., 1995; Shitara, Hayashi, Takahama, Kaneda, & Yonekawa, 1998; P. Sutovsky et al., 1999). The timing of mitochondrial degradation in embryos also varies between species (Reviewed in (Zuidema & Sutovsky, 2019)). Additionally, many protein cofactors, substrates, and autophagic pathways which act within the post-fertilization mitophagic process remain to be identified. This area of research has relied on studies with mammalian oocytes and zygotes. This led to the development of our species-specific mammalian cell-free system (W. H. Song & Sutovsky, 2018). This system was developed to provide a new tool for the study of post-fertilization sperm mitophagy and other early fertilization events. Specifically, the use of this system in conjunction with quantitative mass spectrometry was a type of study which has never been attempted before, even though it is becoming increasingly popular to investigate sperm proteomes by using quantitative proteomic analyses (Baker et al., 2007; Martínez-Heredia, Estanyol, Ballescà, & Oliva, 2006; Pilatz et al., 2014; Zhang et al., 2022). Attempting to identify ooplasmic proteins which bind to spermatozoa at fertilization and those sperm proteins which begin degrading during fertilization by using mass spectrometry would be exceedingly difficult by using zygotes. This is because post-fertilization sperm mitophagy takes place within the oocyte cytoplasm and the ability to identify the differences in those proteins which are found in the sperm or binding the sperm surface from the rest of the oocyte proteome would be extremely challenging/impossible since we are not yet able to reliably map and quantify single cell proteomes. However, our cell-free system presents a unique tool which can be used to capture number of the early proteomic changes which take place specifically on the fertilizing spermatozoa; this cell-free system has been previously shown to mimic some early fertilization events (W.-H. Song et al., 2021; W. H. Song & Sutovsky, 2018). Thus, we could expect other proteomic events of early fertilization to be mimicked within our cell-free system. By using high-resolution mass spectrometry, we captured differences in relative protein abundance between primed control spermatozoa and cell-free treated spermatozoa. Furthermore, we captured this data at two different time points, i.e. after 4 hours and 24 hours of co-incubation within the cell-free system. Furthermore, we identified proteins of interest which can be further explored by using more targeted sperm phenotype studies.

This study was constrained to two time points, which allows for some temporal differences to be captured, but the differences over time in this cell-free system could be immense and the differences in the protein inventories compiled for each time point may be indicative of this. Furthermore, this cell-free system while useful does not perfectly capture all the events which take place during *in vivo* fertilization. The cell-free system is intended to mimic early fertilization events but is presumably not the exact same as *in vitro* fertilization. Furthermore, this study only captures changes in protein abundance. Proteins which remain at relatively stable abundances but undergo changes in localization and/or modification resulting in altered biological activity would not be captured by the parameters set forth in this study, but expectedly play important roles in early fertilization mechanisms. Despite these recognized limitations, this cell-free system used in conjunction with mass spectrometry allowed a glimpse into early fertilization proteomics in a way that has not been attempted before.

426 Our study ultimately identified 185 proteins which underwent a significant change in abundance within  
427 our parameters as described above (**Table S1**). Of these proteins, 144 were identified during the 4-hour cell-  
428 free system trial (**Table 1**) and 63 were found during the 24-hour cell-free system trial (**Table 2**), with 22  
429 proteins overlapping between the trials. This lack of overlap was surprising but again may be reflective of our  
430 inability to truly detect the dynamic changes which take place within the cell-free system.

431 Considering the dynamic proteomic remodeling of both the oocyte and spermatozoa which takes place  
432 during early fertilization, these 185 proteins which have been identified likely play roles in processes beyond  
433 sperm mitophagy. Pathways related to pronuclear development, sperm aster formation, and degradation of  
434 the perinuclear theca, acrosome remnants, and tail structures including the mitochondrial sheath may all be  
435 captured. However, several autophagy-related proteins were found within our inventory including L-lactate  
436 dehydrogenase B chain, keratin 8, glycogen synthase kinase 3 beta 5, BAG family molecular chaperone  
437 regulator 5, sorting and assembly machinery component 50, and FUN14 domain-containing protein 2.  
438 Interestingly these proteins were all found in class 3, and thus these proteins may be mitophagy determinants  
439 or regulators which must be recognized by ooplasmic mitophagy receptors and removed from  
440 spermatozoa/sperm mitochondria for mitophagy to take place. In addition to these proteins, multiple  
441 components and regulators of the ubiquitin-proteasome system were also identified including 20S  
442 proteasomal subunits alpha type 2, 3, and 8, 26S proteasome non-ATPase regulatory subunit 2, 26S  
443 proteasome subunit ATPase 2, proteasome assembly chaperone 2, ubiquitin specific peptidase 50, E3  
444 ubiquitin ligase cullin 4B and OTU deubiquitinase. These proteins are found in both classes 2 and 3; they may  
445 be involved in UPS-mediated mitophagy or play roles in the degradation of other sperm structures including  
446 the tail and perinuclear theca. There is also evidence of sperm proteasomes playing a role in acrosomal  
447 exocytosis, zona pellucida degradation, and events linked with sperm capacitation (Sutovsky, 2011; Zigo,  
448 Manaskova-Postlerova, Jonakova, Kerns, & Sutovsky, 2019; Zimmerman et al., 2011).

449 Class 1 proteins were proteins that were not identified within our primed control sperm proteome but  
450 were found in our cell-free system treated spermatozoa. We interpreted these as oocyte proteins which  
451 interacted with the oocyte extract exposed spermatozoa and remained bound to them after thorough  
452 washing at the end of co-incubation interval. Indeed, among the identified Class 1 proteins were several well  
453 documented oocyte-specific proteins which are known to interact with spermatozoa during early fertilization  
454 events, before or after sperm incorporation in the oocyte cytoplasm and are only found in oocytes. Adding to  
455 our confidence in the specificity of this cell-free proteomic system, these proteins included zona pellucida  
456 proteins 2, 3, and 4; ovastacin, DNA methyltransferase 1, and nucleoplasmin 2. Also, within Class 1, we  
457 observed proteins related to polyspermy prevention, pronuclear formation, cell development, and as well as  
458 several ROS scavenging proteins (**Figure 2A and B**). These pathways all reinforce known oocyte functions  
459 taking place during early fertilization events. Being able to capture some of these proteomic interactions is  
460 encouraging and shows that our cell-free system is indeed recapitulating specific proteomic interactions such  
461 as would be observed during *in vitro* fertilization.

462 Class 2 proteins were identified in the primed control samples but were found in an increased  
463 abundance within the cell-free system treated samples. Proteins in this class are expected to be oocyte  
464 derived proteins which bind the sperm structures and stay bound. However, this class may also include sperm  
465 proteomic changes which are stimulated by the ooplasmic exposure but not directly attributable to oocyte  
466 proteins binding the spermatozoa. There is some evidence that during capacitation, nuclear-encoded mRNAs  
467 in the spermatozoa are translated by mitochondrial ribosomes, specifically to support capacitation,  
468 hyperactivation, acrosomal exocytosis, and fertilization. Mitochondrial proteins, sperm tail axonemal proteins,  
469 and acrosomal function related proteins unexpectedly found in this category could be explained by this

theory; this concerns cytochrome C1, cytochrome C oxidase subunit 5A, stomatin like 2, A-kinase anchoring protein 4, NADH:ubiquinone oxidoreductase subunit B5 and B9, and Tektin 1. In fact, STOML2 is a regulator of mitochondrial translation, further providing some credence to this hypothesis. This sperm translation theory remains controversial, however, and does not necessarily explain these trends (Gur & Breitbart, 2006). During Class 2 protein analysis at both time points, we observed an increase in proteasomal subunits/chaperones, as discussed above. Proteins related to spermatogenesis were also identified at each time point. Within Class 2 at both time points, proteins which are known to interact with sperm nuclear DNA during spermatogenesis were identified, including testis-specific serine kinase 6, spermatogenesis associated 24, and PHD finger protein 7. These proteins could perhaps assist in hyper-condensation of the sperm nucleus during spermatogenesis and may also play a role in decondensation of the sperm nucleus upon fertilization. During the 4-hour trial, proteins related to the acrosome reaction, and proteins within the mitochondrial respiratory chain were also identified which is somewhat surprising as we would expect these proteins to begin to be reduced but perhaps this is an indication of some capacitation-like events still taking place early on during our cell-free system co-incubation. Proteins in these categories are no longer identified at 24 hours, perhaps these proteins are early substrates of the ooplasmic protein recycling machinery (**Figure 2C and D**).

Among the Class 3 proteins, those which underwent a reduction in abundance after extract co-incubation, we observed sperm tail, acrosomal, mitochondrial, centrosome-related, spermatogenic, capacitation related, and membrane proteins. These aforementioned structures and systems are no longer necessary after fertilization. Specifically, during the 4-hour trials, 14% of the proteins categorized as Class 3 were tail proteins, 12% were mitochondrial proteins, 6% were spermatogenesis related and 6% were testis/epididymal specific proteins (**Figure 2E**). All of these sperm protein types being degraded during early fertilization would be expected. During the 24-hour trial, 7% of proteins observed were mitochondrial, and 12% were spermatogenesis related, supporting early degradation of some of these substrates. Surprisingly, there were no known tail proteins identified in the 24-hour trial, though 7% of proteins were known structural proteins (**Figure 2F**). Additionally, several autophagy/mitophagy regulators were found within this class as well. Readers will note that during the 4-hour trial, 108 of the 144 proteins identified, or 75%, fell into Class 3. During the 24-hour trial 43 of the 63 identified proteins, or 68%, fell into Class 3. This means that in both trials, the majority of spermatozoa changes observed were reductions in sperm protein content. This is not surprising when considering the context of sperm structure recycling and remodeling during fertilization. Spermatozoa contribute nuclear, chromosomal DNA; a centriole, mRNAs, and a variety of proteins and other molecules to the newly forming embryo; however, the rest of the spermatozoa structures are recycled in an orderly fashion after fertilization (Sutovsky, 2004; Sutovsky & Schatten, 2000). This includes the mitochondrial sheath, as well as structural sperm tail proteins and the remnants of the acrosome, perinuclear theca, and pericentriolar compartment (Sutovsky, 2004). Spermatozoa retain many proteins which ultimately are degraded upon fertilization, a concept which appears to be further reinforced by this study.

Based on this mass spectrometry work, six candidate mitophagy proteins of interest were investigated by using the porcine cell-free system and porcine IVF in conjunction with ICC to detect protein localization patterns within each system. This was done to characterize changes in these proteins during early fertilization events, with an emphasis on exploring their potential roles in post-fertilization mitophagy. We observed that all six proteins appeared to match their mass spectrometry classifications when evaluated by ICC, though PSMG2 and PSMA3 did not increase dramatically in fluorescence intensity (as expected from Class 2 protein), in zygotes, PSMG2 and PSMA3 localization patterns clearly fit the expected increase in abundance. The other 4 proteins corresponded with mass spectrometry results in the cell-free system and in zygotes when observed

513 via ICC. Additional discussion of these 6 candidate proteins can be found in the Supplemental Discussion  
514 section.

515 In summary, our study harnessed comparative proteomic analysis in conjunction with our novel  
516 porcine cell-free system to capture proteomic alterations to spermatozoa which take place during oocyte  
517 cytoplasm exposure, a system which has been shown to faithfully mimic some early fertilization events. In  
518 total, 185 proteins were identified to undergo significant changes in abundance. Six of these proteins were  
519 further investigated and their localization patterns were characterized in the porcine cell-free system and  
520 porcine zygotes. These six proteins warrant further exploration but were able to showcase that our mass  
521 spectrometry data can be replicated and further understood using immunocytochemistry. More work must be  
522 done to further understand these six proteins and more candidates from the 185 proteins inventory should be  
523 investigated. However, this mass spectrometry study is the first of its kind to be conducted, and along with the  
524 further exploration of six candidates, it highlights the usefulness of our porcine cell-free system for the  
525 exploration of early fertilization events, such as post-fertilization sperm mitophagy. This novel system will  
526 remain a useful tool to explore early fertilization events at the molecular level.

## 527 **Materials and Methods**

### 528 ***Antibodies and probes***

529 Rabbit polyclonal anti-FUNDC2 (PA570823), MitoTracker® Red CMXRos, and 4',6-diamidino-2-phenylindole  
530 (DAPI) were purchased from Invitrogen, Waltham, MA. Mouse monoclonal anti-PSMA3 (BML-PW8115) was  
531 purchased from Enzo Life Sciences, Farmingdale, NY. Rabbit polyclonal anti-SAMM50 (20824-I-AP) was  
532 purchased from ProteinTech Group, Rosemount, IL. Mouse monoclonal anti-BAG5 (CF810618) was purchased  
533 from OriGene Technologies, Rockville, MD. Rabbit polyclonal anti-PACRG (ab4090), rabbit polyclonal anti-  
534 SPATA18 (180154), mouse monoclonal anti-MVP (ab14562) and rabbit polyclonal anti-PSMG2 (ab172909)  
535 were purchased from Abcam, Cambridge, United Kingdom. HRP-conjugated goat anti-mouse IgG (31430), goat  
536 anti-rabbit IgG (31460), goat anti-mouse IgG TRITC (T2762), goat anti-rabbit IgG FITC (65-6111), goat anti-  
537 rabbit IgG TRITC (T2769) and goat anti-mouse FITC (62-6511) were purchased from ThermoFischer Scientific,  
538 Waltham, MA. Beltsville thawing solution (BTS) boar semen extender supplied with gentamicin was purchased  
539 from IMV Technologies, L'Aigle, France. Unless otherwise noted, all chemicals used in this study were  
540 purchased from Sigma-Aldrich, St. Louis, MO.

### 542 ***Boar semen collection and processing***

543 Boars were housed at the University of Missouri Animal Science Research Center. Fresh boar semen was  
544 collected in one regular collection per week, transferred into 15 mL centrifuge tubes, and centrifuged at 800 ×  
545 g for 10 min to separate spermatozoa from seminal plasma. Sperm concentration was assessed by using a light  
546 microscope and a hemocytometer (ThermoFischer Scientific, Waltham, MA). Only semen collections with  
547 >80% motile spermatozoa and <20% morphological abnormalities were used. Spermatozoa were diluted with  
548 BTS to a final concentration of  $1 \times 10^8$  spermatozoa/mL and stored in a sperm incubator at 17°C for up to 5  
549 days.

### 550 ***Collection and in vitro maturation (IVM) of pig oocytes***

551 Porcine ovaries were obtained from a local slaughterhouse. Cumulus-oocyte complexes (COCs) were  
552 aspirated from antral follicles of 2-6 mm size and washed three times with HEPES buffered Tyrode Lactate  
553 medium containing 0.01% (w/v) polyvinyl alcohol (TL-HEPES-PVA). COCs were transferred into 500 µL wells of  
554 oocyte maturation medium (TCM 199, Mediatech, Inc., Manassas, VA) supplemented with 0.1% PVA, 3.05 mM  
555 D-glucose, 0.91 mM sodium pyruvate, 20 µg/mL of gentamicin, 0.57 mM cysteine, 0.5 µg/mL LH (L5269), 0.5



556  $\mu\text{g/mL}$  FSH (F2293), 10 ng/mL epidermal growth factor (E4127), 10% (v/v) porcine follicular fluid. The media  
557 was overlaid with mineral oil in four-well dishes (ThermoFischer) and the COCs were incubated at 38.5°C, with  
558 5% CO<sub>2</sub> in the air, for 40 to 44 hours.

### 559 ***In Vitro Fertilization (IVF) and In Vitro Culture (IVC) of Pig Oocytes/Zygotes***

560 Cumulus cells of matured COCs were removed with 0.1% (w/v) hyaluronidase in TL-HEPES-PVA medium.  
561 MII oocytes as identified by the presence of a polar body. Mature oocytes were then washed three times with  
562 TL-HEPES-PVA medium and once with Tris-buffered medium (mTBM) containing 0.3% (w/v) BSA (A7888).  
563 Between 30–40 oocytes were placed into 100  $\mu\text{L}$  drops of the mTBM covered with mineral oil in a 35 mm  
564 polystyrene culture dish, then incubated until spermatozoa were prepared for fertilization. Liquid semen  
565 preserved in BTS extender solution was washed with PBS containing 0.1% (w/v) PVA (PBS-PVA) two times by  
566 centrifugation at 800 x g for 5 min. To stain mitochondria in the sperm tail, the boar spermatozoa were  
567 incubated with vital, fixable, mitochondrion-specific probe MitoTracker<sup>®</sup> Red CMXRos for 10 min at 38.5°C. The  
568 spermatozoa pre-labeled with MitoTracker were resuspended in mTBM medium. The sperm suspension in  
569 mTBM medium was then added to the 100  $\mu\text{L}$  drops of mTBM medium for a final concentration of 2.5 to 5 x 10<sup>5</sup>  
570 spermatozoa/mL. Matured oocytes were incubated with spermatozoa for 5 hours at 38.5°C, with 5% CO<sub>2</sub> in the  
571 air, then transferred to 500  $\mu\text{L}$  drops of MU3 medium (Chen et al., 2018) containing 0.4% (w/v) BSA (A6003) for  
572 additional culture.

### 573 ***Sperm Priming for Cell-Free System***

574 Boar spermatozoa were washed with phosphate-buffered saline (PBS, 137 mM NaCl, 2.7 mM KCl, 10 mM  
575 Na<sub>2</sub>HPO<sub>4</sub>, 1.8 mM KH<sub>2</sub>HPO<sub>4</sub>, pH = 7.2) containing 0.1% (w/v) PVA (PBS-PVA) two times by centrifugation at 800  
576 x g for 5 min. The sperm mitochondria were labeled with MitoTracker<sup>®</sup> Red CMXRos for 10 min at 37°C. At the  
577 previously tested concentration of 400 nM, the probe specifically stains boar sperm mitochondria but is also  
578 taken up by the sperm head structures (W. H. Song et al., 2016).

579 To prime sperm mitochondrial sheaths for cell-free studies, spermatozoa pre-labeled with MitoTracker  
580 were demembrated/permeabilized with 0.05% (w/v) L- $\alpha$ -lysophosphatidylcholine in KMT (20 mM KCl, 5 mM  
581 MgCl<sub>2</sub>, 50 mM TRIS-HCl, pH = 7.0) for 10 min at 37°C and washed twice with the KMT for 5 min by centrifugation,  
582 to terminate the reaction. The spermatozoa were subsequently incubated with 1.0 mM dithiothreitol (DTT)  
583 diluted in KMT, pH = 8.2 for 20 min at 37°C and washed twice with KMT for 5 min by centrifugation, to terminate  
584 the reaction.

### 585 ***Preparation of Porcine Oocyte Extracts***

586 Cumulus cells of matured COCs were removed with 0.1% (w/v) hyaluronidase in TL-HEPES-PVA medium.  
587 The oocytes were then searched for mature MII oocytes as designated by the presence of a polar body. Mature  
588 oocytes were then washed three times with TL-HEPES-PVA medium. Zonae pellucidae (ZP) were removed by  
589 0.1% (w/v) pronase (Sigma) in TL-HEPES-PVA. The ZP-free, mature MII oocytes were transferred into an  
590 extraction buffer (50 mM KCl, 5 mM MgCl<sub>2</sub>, 5 mM ethylene glycol-bis[ $\beta$ -aminoethyl ether]-N,N,N',N'-tetraacetic  
591 acid [EGTA], 2 mM  $\beta$ -mercaptoethanol, 0.1 mM PMSF, protease inhibitor cocktail [78410, ThermoFischer  
592 Scientific], 50 mM HEPES, pH = 7.6) containing an energy-regenerating system (2 mM ATP, 20 mM  
593 phosphocreatine, 20 U/mL creatine kinase, and 2 mM GTP), and submerged three times into liquid nitrogen for  
594 5 min each. Next, the frozen-thawed oocytes were crushed by high-speed centrifugation at 16,650 x g for 20  
595 min at 4°C in a Sorvall Biofuge Fresco (Kendro Laboratory Products). Batches of oocyte extract were made from  
596 1,000 oocytes in 100  $\mu\text{L}$  of extract. The supernatants were harvested, transferred into a 1.5 mL tube, and stored  
597 in a deep freezer (-80°C).

### **Co-Incubation of Permeabilized Mammalian Spermatozoa with Porcine Oocyte Extracts**

The permeabilized boar spermatozoa were added to porcine oocyte extracts at a concentration of  $1 \times 10^4$  spermatozoa/10  $\mu$ L of an extract and co-incubated for 4–24 h in an incubator at 38.5°C, with 5% CO<sub>2</sub> in the air. After co-incubation, spermatozoa were washed 3x with KMT. At which point the spermatozoa were either processed for immunocytochemistry (as described below), electrophoresis (as described below), or prepared for mass spectrometry analysis (as described below).

### **Immunocytochemistry**

The ICC protocol was performed as described previously (Sutovsky, 2004). Briefly, to fix oocytes or embryos, cells were fixed with 2% (v/v) formaldehyde in PBS for 40 min at room temperature, washed and processed, or stored in PBS at 4°C until used for immunocytochemistry. In some cases, for oocytes and embryos, zona pellucida was removed using 0.1%, (w/v) pronase in TL-HEPES-PVA and the cells were then fixed with 2% (v/v) formaldehyde in PBS for 40 min at room temp. To fix ejaculated, primed, or cell-free treated boar spermatozoa; microscopy coverslips were overlaid with 300  $\mu$ L of 1% (w/v) aqueous solution of poly-L-lysine, incubated for 5 min, then shaken off, and allowed to dry. The poly-L-lysine coated coverslips were overlaid with 400  $\mu$ L of warm KMT medium (37°C; pH = 7.3) and 2  $\mu$ L of sperm suspension ( $1 \times 10^8$  spermatozoa/mL) were added onto coverslips and allowed to settle on the lysine-coated surface for 10 min on a 38.5°C plate. KMT was shaken off from the coverslips and coverslips were overlaid with 2% (v/v) formaldehyde in PBS for 40 min fixation at room temperature, then used for immunocytochemistry immediately or stored at 4°C. Both spermatozoa and oocytes were permeabilized in PBS with 0.1% (v/v) Triton X-100 (PBST) at room temperature for 40 min, then blocked with 5% (v/v) normal goat serum (NGS) in PBST for 25 min. Spermatozoa/oocytes were incubated with the appropriate primary antibodies diluted in PBST containing 1% (v/v) NGS overnight at 4°C. The primary antibodies used throughout the trial and their dilution ratios are as follows: anti-FUNDC2 (1:50), anti-PACRG (1:50), anti-SPATA18 (1:50), anti-MVP (1:50), anti-SAMM50 (1:50), anti-BAG5 (1:50), anti-PSMG2 (1:25) and anti-PSMA3 (1:25). The samples were incubated with appropriate species-specific secondary antibodies such as goat-anti-rabbit (GAR)-IgG-FITC (1:100 dilution), GAR-IgG-TRITC (1:100), goat-anti-mouse (GAM)-IgG-FITC (1:100), or GAM-IgG-TRITC, all diluted 1:100 in PBST with 1% (v/v) NGS for 40 min at room temperature; 2.5  $\mu$ g/mL DNA stain DAPI was included as well. The samples were mounted on microscopy slides in VectaShield mounting medium (Vector Laboratories, Burlingame, CA), and imaged using a Nikon Eclipse 800 microscope (Nikon Instruments Inc., Melville, NY) with a Retiga QI-R6 camera (Teledyne QImaging, Surrey, BC, Canada) operated by MetaMorph 7.10.2.240. software (Molecular Devices, San Jose, CA). Images were adjusted for contrast and brightness in Adobe Photoshop 2020 (Adobe Systems, Mountain View, CA), to match the fluorescence intensities viewed through the microscope eyepieces.

### **SDS-PAGE and Western Blotting**

The oocyte extracts proteins were prepared for WB by mixing the oocyte extract with 4 $\times$  LDS loading buffer and ultrapure water to obtain 1 $\times$  LDS (106 mM Tris-HCl, 141 mM Tris base, 2% (w/v) LDS, 10% (w/v) Glycerol, 0.75% (w/v) Coomassie Blue G250, 0.025% (w/v) Phenol Red, pH = 8.5), supplemented with 2.5% (v/v)  $\beta$ -mercaptoethanol and incubated at 70°C for 10 min prior to use. Spermatozoa were suspended in 1 $\times$  LDS loading buffer supplemented with 2.5%  $\beta$ -mercaptoethanol. Spermatozoa were incubated at room temperature in 1 $\times$  LDS loading buffer supplemented with protease inhibitor cocktail for 1 hour on a rocking platform and spun. Total protein equivalent of 50 to 100 million spermatozoa, and 50 MII oocytes were loaded per lane, respectively, on a NuPAGE 4–12% Bis-Tris gel (Invitrogen). Electrophoresis was carried out in the Bis-Tris system using MOPS-SDS running buffer (50 mM MOPS, 50 mM Tris base, 0.1% [w/v] SDS, 1 mM EDTA, pH = 7.7) with the cathode buffer supplemented with 5 mM sodium bisulfite. The molecular masses of separated proteins were



641 estimated using Novex® Sharp Pre-stained Protein Standard (Invitrogen, LC5800) run in parallel. PAGE was  
642 carried out for 5 min at 90 Volts to let the samples delve into the gel and then for another 60–70 min at 200  
643 Volts. The power was limited to 20 Watts. After PAGE, proteins were electro-transferred to polyvinylidene  
644 fluoride (PVDF) membranes (MilliporeSigma, Burlington, MA) using Owl wet transfer system (ThermoFischer  
645 Scientific) at 65 Volts for 90 min for immunodetection, using Bis-Tris-Bicine transfer buffer (25 mM Bis-Tris base,  
646 25 mM Bicine, 1 mM EDTA, pH = 7.2) supplemented with 10% (v/v) methanol per membrane, and 2.5 mM  
647 sodium bisulfite. The membranes with the transferred proteins were blocked with 10% (w/v) non-fat milk in TBS  
648 with 0.05% (v/v) Tween 20 (TBST, Sigma) for 40 min. The membranes were then incubated with the appropriate  
649 primary antibodies diluted in 5% non-fat milk in TBST overnight at 4°C. The primary antibodies used throughout  
650 the trial and their dilution ratios are as follows: anti-FUNDC2 (1:1000), anti-PACRG (1:1000), anti-SPATA18  
651 (1:1000), anti-MVP (1:1000), anti-SAMM50 (1:1000), anti-BAG5 (1:1000), anti-PSMG2 (1:1000) and anti-PSMA3  
652 (1:1000). The membranes were subsequently incubated with appropriate species-specific secondary antibodies  
653 such as HRP-conjugated goat anti-mouse IgG (GAM-IgG-HRP), or goat anti-rabbit (GAR-IgG-HRP) for 40 min at  
654 room temperature. The membranes were reacted with chemiluminescent substrate (Millipore), detected using  
655 ChemiDoc Touch Imaging System (Bio-Rad, Hercules, CA, USA) to record the protein bands, and analyzed by  
656 Image Lab Software (ver. 5.2.1, Bio-Rad, Hercules, CA, USA). The membranes were stained with CBB R-250 after  
657 chemiluminescence detection for protein load control.

### 658 **Mass Spectrometry Sample Preparation**

659 Cell-free system exposed spermatozoa, spermatozoa controls, and oocyte extract underwent protein  
660 precipitation using a TCA protein precipitation protocol from Dr. Luis Sanchez. These samples were then  
661 resuspended in acetone and submitted to the University of Missouri Gehrke Proteomics Center for MALDI-TOF  
662 Mass Spectrometry analysis. At the Proteomics Center, these samples were washed by 80% cold acetone  
663 twice. Then 10 µl 6M urea 2M thiourea and 100mM ammonium bicarbonate was added to the protein pellet.  
664 Solubilized protein was reduced by DTT and alkylated by iodoacetamide. Then trypsin was added for  
665 digestion overnight. The digested peptides were C18 ziptip desalted, lyophilized and resuspended in 10 µL  
666 5/0.1% acetonitrile/formic acid.

667 A volume of 1 µL of suspended peptides was loaded onto a C18 column with a step gradient of  
668 acetonitrile at 300 nL/min. A Bruker nanoElute system was connected to a timsTOF pro mass spectrometer.  
669 The loaded peptide was eluted at a flow rate of 300 nL/min with the initial gradient of 3% B (A: 0.1% formic  
670 acid in water, B: 99.9% acetonitrile, 0.1% formic acid), followed by 11 min ramp to 17%B, 17-25% B over 21  
671 min, 25-37% B over 10 min, 37-80% B over 4 min, holding at 80% B for 9 min, 80-3% B in 1 min, and holding at  
672 3% B for 3 min. Total running time was 60 min.

673 Raw data was searched using PEAKS (version X+) with UniProt *Sus scrofa* protein database downloaded  
674 March 01, 2019 with 88374 itmes. Samples were searched with trypsin as enzyme, 4 missed cleavages  
675 allowed; carbamidomethyl cysteine as a fixed modification; oxidized methionine and acetylation on protein N  
676 terminus as variable modification. 50 ppm mass tolerance on precursor ions, 0.1Da on fragment ions. For the  
677 protein identification, the following criteria were used: peptide FDR and protein FDR < 1%, and >=4 spectrum  
678 per protein in each sample. Samples were submitted in triplicate for both the 4- and 24-hours cell-free system  
679 trials.

### 680 **Mass Spectrometry Data Statistical Analysis**

681 Prior to statistical analysis, the primed and cell-free treated sperm samples were normalized based on  
682 the content of outer dense fiber proteins (ODF) 1, 2, and 3. To further reduce batch variance, the protein  
683 spectrum counts were also subject to normalization by means. After these normalization steps, the primed

684 and cell-free extract treated sperm samples were statistically compared using a paired T-test. This T-test was  
685 comparing the relative normalized protein abundance between our primed control and cell-free treated  
686 samples.  $P < 0.1$  and  $P < 0.2$  was considered to indicate statistical significance.

### 687 **Protein Classification**

688 Both the 4-hour and 24-hour protein inventories were divided into three different classes. Class 1  
689 proteins were detected only in the oocyte extract (not in the vehicle control or primed control spermatozoa)  
690 and found on the spermatozoa only after extract co-incubation. These proteins are interpreted as ooplasmic  
691 mitophagy receptors/determinants and nuclear/centrosomal remodeling factors ( $p < 0.2$ ). Class 2 proteins were  
692 detected in the primed spermatozoa but increased in the spermatozoa exposed to cell-free system co-  
693 incubation ( $p < 0.1$ ). Class 3 proteins were present in both the gametes or only the spermatozoa, but are  
694 decreased in the spermatozoa after co-incubation, interpreted as sperm-borne mitophagy determinants  
695 and/or sperm-borne proteolytic substrates of the oocyte autophagic system ( $p < 0.1$ ).

### 696 **Functional analysis**

697 Following the statistical analysis and protein classification, the function of all proteins  $p < 0.1$  ( $p < 0.2$  for  
698 Class 1), were searched using a PubMed literature search and UniProt Knowledgebase search. Known functions  
699 can be found in **Table 1** and **Table 2**. Proteins were then categorized based on known functions and known roles  
700 within pathways, in gametes and/or somatic cells. Protein categorization results can be found in the pie chart  
701 images of **Figure 2**.

### 702 **Acknowledgements**

704 We are truly thankful for the support received from the staff of the National Swine Research and  
705 Resource Center, the University of Missouri, funded by National Institutes of Health (NIH) grant U42  
706 OD011140, as well as Professor Randall Prather and his associates for their kind support, including but not  
707 limited to gilt ovary and boar semen collections. We would also like to thank the University of Missouri Gehrke  
708 Proteomics Center, and their staff who conducted the mass spectrometry data collection and statistical  
709 analysis.

### 710 **References**

- 712 Al Rawi, S., Louvet-Vallee, S., Djeddi, A., Sachse, M., Culetto, E., Hajjar, C., . . . Galy, V. (2011). Postfertilization  
713 autophagy of sperm organelles prevents paternal mitochondrial DNA transmission. *Science*, *334*(6059),  
714 1144-1147. doi:10.1126/science.1211878
- 715 Anderson, S., Bankier, A. T., Barrell, B. G., de Bruijn, M. H., Coulson, A. R., Drouin, J., . . . Young, I. G. (1981).  
716 Sequence and organization of the human mitochondrial genome. *Nature*, *290*(5806), 457-465.  
717 doi:10.1038/290457a0
- 718 Ankel-Simons, F., & Cummins, J. M. (1996). Misconceptions about mitochondria and mammalian fertilization:  
719 implications for theories on human evolution. *Proc Natl Acad Sci U S A*, *93*(24), 13859-13863.  
720 doi:10.1073/pnas.93.24.13859
- 721 Baker, M. A., Reeves, G., Hetherington, L., Müller, J., Baur, I., & Aitken, R. J. (2007). Identification of gene  
722 products present in Triton X-100 soluble and insoluble fractions of human spermatozoa lysates using  
723 LC-MS/MS analysis. *Proteomics Clin Appl*, *1*(5), 524-532. doi:10.1002/prca.200601013

- 724 Chen, P. R., Redel, B. K., Spate, L. D., Ji, T., Salazar, S. R., & Prather, R. S. (2018). Glutamine supplementation  
725 enhances development of in vitro-produced porcine embryos and increases leucine consumption from  
726 the medium. *Biol Reprod*, *99*(5), 938-948. doi:10.1093/biolre/iy129
- 727 Gur, Y., & Breitbart, H. (2006). Mammalian sperm translate nuclear-encoded proteins by mitochondrial-type  
728 ribosomes. *Genes & Development*, *20*(4), 411-416. doi:10.1101/gad.367606
- 729 Hajnóczky, G., Csordás, G., Das, S., Garcia-Perez, C., Saotome, M., Sinha Roy, S., & Yi, M. (2006). Mitochondrial  
730 calcium signalling and cell death: approaches for assessing the role of mitochondrial Ca<sup>2+</sup> uptake in  
731 apoptosis. *Cell Calcium*, *40*(5-6), 553-560. doi:10.1016/j.ceca.2006.08.016
- 732 Kaneda, H., Hayashi, J., Takahama, S., Taya, C., Lindahl, K. F., & Yonekawa, H. (1995). Elimination of paternal  
733 mitochondrial DNA in intraspecific crosses during early mouse embryogenesis. *Proc Natl Acad Sci U S A*,  
734 *92*(10), 4542-4546. doi:10.1073/pnas.92.10.4542
- 735 Liao, W. S., Gonzalez-Serricchio, A. S., Deshommès, C., Chin, K., & LaMunyon, C. W. (2007). A persistent  
736 mitochondrial deletion reduces fitness and sperm performance in heteroplasmic populations of *C.*  
737 *elegans*. *BMC Genet*, *8*, 8. doi:10.1186/1471-2156-8-8
- 738 Luo, S., Valencia, C. A., Zhang, J., Lee, N. C., Slone, J., Gui, B., . . . Huang, T. (2018). Biparental Inheritance of  
739 Mitochondrial DNA in Humans. *Proc Natl Acad Sci U S A*, *115*(51), 13039-13044.  
740 doi:10.1073/pnas.1810946115
- 741 Martínez-Heredia, J., Estanyol, J. M., Balleascà, J. L., & Oliva, R. (2006). Proteomic identification of human sperm  
742 proteins. *Proteomics*, *6*(15), 4356-4369. doi:10.1002/pmic.200600094
- 743 McBride, H. M., Neuspiel, M., & Wasiak, S. (2006). Mitochondria: more than just a powerhouse. *Curr Biol*,  
744 *16*(14), R551-560. doi:10.1016/j.cub.2006.06.054
- 745 McFarland, R., Taylor, R. W., & Turnbull, D. M. (2007). Mitochondrial disease--its impact, etiology, and  
746 pathology. *Curr Top Dev Biol*, *77*, 113-155. doi:10.1016/S0070-2153(06)77005-3
- 747 Miyamoto, K., Furusawa, T., Ohnuki, M., Goel, S., Tokunaga, T., Minami, N., . . . Imai, H. (2007).  
748 Reprogramming events of mammalian somatic cells induced by *Xenopus laevis* egg extracts. *Mol*  
749 *Reprod Dev*, *74*(10), 1268-1277. doi:10.1002/mrd.20691
- 750 Miyamoto, K., Tsukiyama, T., Yang, Y., Li, N., Minami, N., Yamada, M., & Imai, H. (2009). Cell-free extracts from  
751 mammalian oocytes partially induce nuclear reprogramming in somatic cells. *Biol Reprod*, *80*(5), 935-  
752 943. doi:10.1095/biolreprod.108.073676
- 753 Pilatz, A., Lochnit, G., Karnati, S., Paradowska-Dogan, A., Lang, T., Schultheiss, D., . . . Wagenlehner, F. (2014).  
754 Acute epididymitis induces alterations in sperm protein composition. *Fertil Steril*, *101*(6), 1609-  
755 1617.e1601-1605. doi:10.1016/j.fertnstert.2014.03.011
- 756 Politi, Y., Gal, L., Kalifa, Y., Ravid, L., Elazar, Z., & Arama, E. (2014). Paternal mitochondrial destruction after  
757 fertilization is mediated by a common endocytic and autophagic pathway in *Drosophila*. *Dev Cell*, *29*(3),  
758 305-320. doi:10.1016/j.devcel.2014.04.005
- 759 Sato, M., & Sato, K. (2011). Degradation of paternal mitochondria by fertilization-triggered autophagy in *C.*  
760 *elegans* embryos. *Science*, *334*(6059), 1141-1144. doi:10.1126/science.1210333
- 761 Schwartz, M., & Vissing, J. (2002). Paternal inheritance of mitochondrial DNA. *N Engl J Med*, *347*(8), 576-580.  
762 doi:10.1056/NEJMoa020350
- 763 Sharpley, M. S., Marciniak, C., Eckel-Mahan, K., McManus, M., Crimi, M., Waymire, K., . . . Wallace, D. C.  
764 (2012). Heteroplasmy of mouse mtDNA is genetically unstable and results in altered behavior and  
765 cognition. *Cell*, *151*(2), 333-343. doi:10.1016/j.cell.2012.09.004

- 766 Shitara, H., Hayashi, J. I., Takahama, S., Kaneda, H., & Yonekawa, H. (1998). Maternal inheritance of mouse  
767 mtDNA in interspecific hybrids: segregation of the leaked paternal mtDNA followed by the prevention  
768 of subsequent paternal leakage. *Genetics*, *148*(2), 851-857.
- 769 Slone, J., Zou, W., Luo, S., Schmitt, E. S., Chen, S. M., Wang, X., . . . Huang, T. (2020).  
770 doi:10.1101/2020.02.26.939405
- 771 Song, W.-H., Zuidema, D., Yi, Y.-J., Zigo, M., Zhang, Z., Sutovsky, M., & Sutovsky, P. (2021). Mammalian Cell-  
772 Free System Recapitulates the Early Events of Post-Fertilization Sperm Mitophagy. *Cells*, *10*(9), 2450.  
773 doi:10.3390/cells10092450
- 774 Song, W. H., & Sutovsky, P. (2018). Porcine Cell-Free System to Study Mammalian Sperm Mitophagy. *Methods*  
775 *Mol Biol*. doi:10.1007/7651\_2018\_158
- 776 Song, W. H., Yi, Y. J., Sutovsky, M., Meyers, S., & Sutovsky, P. (2016). Autophagy and ubiquitin-proteasome  
777 system contribute to sperm mitophagy after mammalian fertilization. *Proc Natl Acad Sci U S A*, *113*(36),  
778 E5261-5270. doi:10.1073/pnas.1605844113
- 779 Sutovsky, P. (2004). Visualization of sperm accessory structures in the mammalian spermatids, spermatozoa,  
780 and zygotes by immunofluorescence, confocal, and immunoelectron microscopy. *Methods Mol Biol*,  
781 *253*, 59-77. doi:10.1385/1-59259-744-0:059
- 782 Sutovsky, P. (2011). Sperm proteasome and fertilization. *Reproduction*, *142*(1), 1-14. doi:10.1530/REP-11-0041
- 783 Sutovsky, P., Manandhar, G., Laurincik, J., Letko, J., Caamano, J. N., Day, B. N., . . . Sutovsky, M. (2005).  
784 Expression and proteasomal degradation of the major vault protein (MVP) in mammalian oocytes and  
785 zygotes. *Reproduction*, *129*(3), 269-282. doi:10.1530/rep.1.00291
- 786 Sutovsky, P., McCauley, T. C., Sutovsky, M., & Day, B. N. (2003). Early degradation of paternal mitochondria in  
787 domestic pig (*Sus scrofa*) is prevented by selective proteasomal inhibitors lactacystin and MG132. *Biol*  
788 *Reprod*, *68*(5), 1793-1800. doi:10.1095/biolreprod.102.012799
- 789 Sutovsky, P., Moreno, R. D., Ramalho-Santos, J., Dominko, T., Simerly, C., & Schatten, G. (1999). Ubiquitin tag  
790 for sperm mitochondria. *Nature*, *402*(6760), 371-372. doi:10.1038/46466
- 791 Sutovsky, P., Moreno, R. D., Ramalho-Santos, J., Dominko, T., Simerly, C., & Schatten, G. (1999). Ubiquitin tag  
792 for sperm mitochondria. *Nature*, *402*(6760), 371-372. doi:10.1038/46466
- 793 Sutovsky, P., & Schatten, G. (2000). Paternal contributions to the mammalian zygote: fertilization after sperm-  
794 egg fusion. *Int Rev Cytol*, *195*, 1-65. Retrieved from <https://www.ncbi.nlm.nih.gov/pubmed/10603574>
- 795 Sutovsky, P., Simerly, C., Hewitson, L., & Schatten, G. (1998). Assembly of nuclear pore complexes and  
796 annulate lamellae promotes normal pronuclear development in fertilized mammalian oocytes. *J Cell*  
797 *Sci*, *111* ( Pt 19), 2841-2854. Retrieved from <https://www.ncbi.nlm.nih.gov/pubmed/9730977>
- 798 Sutovsky, P., Van Leyen, K., McCauley, T., Day, B. N., & Sutovsky, M. (2004). Degradation of paternal  
799 mitochondria after fertilization: implications for heteroplasmy, assisted reproductive technologies and  
800 mtDNA inheritance. *Reprod Biomed Online*, *8*(1), 24-33. Retrieved from  
801 <https://www.ncbi.nlm.nih.gov/pubmed/14759284>
- 802 Zhang, M., Chiozzi, R. Z., Skerrett-Byrne, D. A., Veenendaal, T., Klumperman, J., Heck, A. J. R., . . . Bromfield, E.  
803 G. (2022). High Resolution Proteomic Analysis of Subcellular Fractionated Boar Spermatozoa Provides  
804 Comprehensive Insights Into Perinuclear Theca-Residing Proteins. *Front Cell Dev Biol*, *10*, 836208.  
805 doi:10.3389/fcell.2022.836208
- 806 Zhou, Q., Li, H., & Xue, D. (2011). Elimination of paternal mitochondria through the lysosomal degradation  
807 pathway in *C. elegans*. *Cell Res*, *21*(12), 1662-1669. doi:10.1038/cr.2011.182

808 Zigo, M., Manaskova-Postlerova, P., Jonakova, V., Kerns, K., & Sutovsky, P. (2019). Compartmentalization of  
809 the proteasome-interacting proteins during sperm capacitation. *Scientific Reports*, 9(1).  
810 doi:10.1038/s41598-019-49024-0

811 Zimmerman, S. W., Manandhar, G., Yi, Y. J., Gupta, S. K., Sutovsky, M., Odhiambo, J. F., . . . Sutovsky, P. (2011).  
812 Sperm proteasomes degrade sperm receptor on the egg zona pellucida during mammalian fertilization.  
813 *PLoS One*, 6(2), e17256. doi:10.1371/journal.pone.0017256

814 Zuidema, D., & Sutovsky, P. (2019). The domestic pig as a model for the study of mitochondrial inheritance.  
815 *Cell Tissue Res*. doi:10.1007/s00441-019-03100-z  
816  
817  
818  
819  
820  
821  
822
